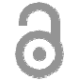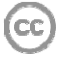

# Genetic associations between circulating immune cells and periodontitis highlight the prospect of systemic immunoregulation in periodontal care

Xinjian Ye<sup>1</sup>, Yijing Bai<sup>2</sup>, Mengjun Li<sup>1</sup>, Yuhang Ye<sup>1</sup>, Yitong Chen<sup>3</sup>, Bin Liu<sup>4</sup>, Yuwei Dai<sup>1</sup>, Shan Wang<sup>1</sup>, Weiyi Pan<sup>1</sup>, Zhiyong Wang<sup>1</sup>, Yingying Mao<sup>4\*</sup>, Qianming Chen<sup>1\*</sup>

<sup>1</sup> Stomatology Hospital, School of Stomatology, Zhejiang University School of Medicine, Zhejiang Provincial Clinical Research Centre for Oral Diseases, Key Laboratory of Oral Biomedical Research of Zhejiang Province, Cancer Centre of Zhejiang University, Hangzhou, China; <sup>2</sup> The First School of Clinical Medicine, Zhejiang Chinese Medical University, Hangzhou, China; <sup>3</sup> School of Stomatology, Zhejiang Chinese Medical University, Hangzhou, China; <sup>4</sup> Department of Epidemiology, School of Public Health, Zhejiang Chinese Medical University, Hangzhou, China

\*For correspondence: qmchen@zju.edu.cn (QC); myy@zcmu.edu.cn (YM)

---

## Abstract

Periodontitis drives irreversible destruction of periodontal tissue and is prone to exacerbating inflammatory disorders. Systemic immunomodulatory management continues to be an attractive approach in periodontal care, particularly within the context of "predictive, preventive, and personalized" periodontics. In the present study, genetic proxies identified through genome-wide association studies (GWAS) for circulating immune cells and periodontitis were incorporated into a comprehensive Mendelian randomization (MR) framework. Univariable MR, multivariable MR, subgroup analysis, reverse MR, and Bayesian model averaging (MR-BMA) were utilized to investigate the causal relationships. Furthermore, transcriptome-wide association study (TWAS) and colocalization analysis were deployed to pinpoint the underlying genes. Consequently, the MR study indicated a causal association between circulating neutrophils, natural killer T cells, plasmacytoid

dendritic cells, and an elevated risk of periodontitis. MR-BMA analysis revealed that neutrophils were the primary contributors to periodontitis. The high-confidence genes *S100A9* and *S100A12*, located on 1q21.3, could potentially serve as immunomodulatory targets for neutrophil-mediated periodontitis. These findings hold promise for early diagnosis, risk assessment, targeted prevention, and personalized treatment of periodontitis. Considering the marginal association observed in our study, further research is required to thoroughly comprehend the biological underpinnings and ascertain the clinical relevance.

## Introduction

### **Periodontitis imposes a considerable social burden on dental practice and general health**

Periodontitis is a highly prevalent disease that affects a considerable percentage of the population. According to large-scale epidemiological research, up to half of all adults worldwide suffer periodontal disease, with severe periodontitis threatening 10.5-12.0 % of them (*Kassebaum et al., 2014*). Furthermore, periodontitis is the leading cause of adult tooth loss, necessitating extensive dental procedures such as extractions, dental implants, or prosthetics, which can be costly and time-consuming for both patients and dental practitioners (*Genco and Sanz, 2020*). Recent research demonstrated a relationship between periodontitis and inflammatory comorbidities such as type 2 diabetes, cardiovascular disease, rheumatoid arthritis, and inflammatory bowel disease (*Hajishengallis and Chavakis, 2021*). The high prevalence and harmful implications of periodontitis underline the importance of managing periodontitis to maintain oral and general health (*Peres et al., 2019*). Since early-stage prevention is the most significant way to improve health, the identification of additional potential risk factors was required to provide predictive, preventive, and personalized strategies for periodontal care (*Ma et al., 2021*).

### **Evidence from epidemiology and pathophysiology demonstrates the impact of circulating immune cells on periodontitis**

Periodontitis is a chronic inflammatory disease characterized by the interactions between microorganisms and host immune response (*Curtis et al., 2020*). The immune response to periodontitis comprises both innate and adaptive immunity, with multiple cytokines, immune cells, and inflammatory pathways participating in a complex interplay (*Dutzan et al., 2016*). Systemic immunological alternations, such as circulating immune cells, play a crucial role in the initiation and progression of periodontitis (*Cekici et al., 2014*). An observational study indicated that patients with periodontitis experience a greater level of circulating leukocytes (*Noz et al., 2021*), while another discovered that the distribution of B cells alters in the context of severe periodontitis, with a higher proportion of circulating memory B cells (*Demoersman et al., 2018*). Furthermore, inflamed periodontal tissue recruits immune cells from circulation (*Hajishengallis, 2020*). With the progression of periodontitis, there is a significant alteration in the quantity of immune cells present within the periodontal tissue. Specifically, an increase in the count of both monocytes and B cells is observed,

whereas a decrease is noted in the count of T cells. (*Nair et al., 2014; Steinmetz et al., 2016*). The promising concept of "trained immunity" has recently provided a greater understanding of the host immune response in periodontitis (*Netea et al., 2020*), which can explain the fact that the increased hyper-responsiveness of circulating immune cells from patients with periodontitis as well as its probable mechanism of mediating periodontitis and its comorbidities (*Li et al., 2023*).

### **Immunomodulation of systemic immune response serves as a hub for periodontal care**

Systemic immunomodulation management has the potential to improve host homeostasis by altering the composition and function of the immune milieu (*Yang et al., 2021*). Periodontitis can be effectively managed by restricting immune cell activation, implying that immunomodulators have significant promise in constructing comprehensive strategies for periodontal management (*Zidar et al., 2021*). For example, resveratrol, quercetin, and N-acetylcysteine were reported to reduce the release of reactive oxygen species (ROS) by neutrophils, which aided in the prevention of periodontitis (*Orihuela-Campos et al., 2015*). Nonetheless, from a medical and therapeutic perspective, it is critical to determine whether the link between circulating immune cells and periodontitis is merely correlative or driven by causative mechanistic interactions (*Lamont and Hajishengallis, 2015*). Understanding the role of systemic immune alternations in periodontitis is critical for developing an effective strategy for early screening of high-risk patients, prompt implementation of definitive prevention, and individualized deployment of targeted treatment, all with the goal of reducing unexpected inflammatory responses, maintaining oral health, and avoiding complications (*Zhang et al., 2023*).

### **Mendelian randomization provides a potent complement to causal inference in terms of genetics**

Previous research has substantiated the potential of immunomodulation management in predicting and preventing periodontitis; however, in observational studies, the association is frequently disguised by reverse causality, confounding factors, and disease conditions, which obscured the intrinsic causal inference between them (*Hajishengallis and Korostoff, 2017*). Mendelian randomization (MR) investigates the causal relationships between risk factors and diseases by exploiting genetic variants as instrumental variables (IVs) (*Davies et al., 2018*), which is less likely to be affected by underlying bias or disease condition, in that alleles are randomly allocated from parents to offspring (*Julian et al., 2023*). Notably, MR with distinct causal relationships may provide fresh evidence from a genomics perspective

(*Golubnitschaja et al., 2014*). We postulate that individuals with a disproportionate immunological network have a higher risk of periodontitis due to unexpected inflammatory reactions.

## Methods

### Study design

The present study, as shown in *Figure 1*, was based on the Strengthening the Reporting of Observational Studies in Epidemiology using the Mendelian Randomization (STROBE-MR) checklist (*Skrivankova et al., 2021*). The present research aims to evaluate the causal association between circulating immune cells and the risk of periodontitis, providing insight into opportunity for systemic immunomodulation management in periodontal care. We utilized summary statistics from publicly available genome-wide association studies (GWAS) to perform both univariable MR (UVMR) and multivariable MR (MVMR) analyses. Furthermore, we replicated the UVMR analysis by excluding potentially pleiotropic SNPs, and subsequently conducted subgroup and reverse MR analyses. Additionally, the Bayesian model averaging (MR-BMA) was employed to pinpoint the predominant characteristics with causal signals. Finally, we conducted a transcriptome-wide association study (TWAS) and colocalization analysis to discern potential genes implicated in biological relationships.

### Data source

Summary-level data on 17 circulating immune cells were obtained from the large-scale GWAS conducted by the Blood Cell Consortium (BCC) and the Sardinian cohort (*Orrù et al., 2020; Vuckovic et al., 2020*). The GWAS data for periodontitis and its subtypes were supplied by the Gene-Lifestyle Interactions in Dental Endpoints collaboration (GLIDE) consortium and the FinnGen cohort (*Kurki et al., 2023; Shungin et al., 2019*). To maintain the homogeneity within the target group and minimize overlap, we performed a screening process on the population. Specifically, the population from the Latin American and the UK Biobank cohort was excluded from the periodontitis data set (*Ye et al., 2023*). The features of GWAS characteristics and included cohorts were highlighted in *Table 1* and *Supplementary File 1* — Table s1.

Candidates for IVs underwent a thorough set of screening procedures. To equalize the sample disparities among databases, a complicated screening criterion was performed. We initially filtered the

*p*-values of the single nucleotide polymorphisms (SNPs), followed by the selection of independent SNPs using the linkage disequilibrium (LD) approach. The  $R^2$  and F-statistics were introduced to demonstrate the degree of genetic variation explained and their relative impact on the outcomes, and SNPs with F-statistics < 10 would be removed based on the first MR assumption (*Papadimitriou et al., 2020*). In addition, SNPs that exhibited a direct association with the outcome would also be deleted to support the third MR assumption. Throughout the harmonization processes, palindromic and ambiguous SNPs were eliminated to ensure the reliability and validity of causal inference. In MVMR, we excluded SNPs situated in the major histocompatibility complex area (MHC, 6p21.31) due to its complexity and confounding effects (*Burgess and Thompson, 2015*).

### Univariable and multivariable Mendelian randomization

In UVMR, the inverse-variance weighted (IVW) method was performed as the primary analysis, and four alternative MR methods, including weighted median, maximum likelihood, MR-Egger, and MR pleiotropy residual sum and outlier (MR-PRESSO) global test were employed for sensitivity testing to assess the robustness of the IVW estimates. Briefly, the IVW assumes that all genetic variations meet the conditions and integrated estimates from multiple genetic variants by weighting them inversely to variances (*Sanderson et al., 2022*). The weighted median generates precise estimates when more than half of the SNPs are valid (*Gormley et al., 2023*). The maximum likelihood offers a normal bivariate distribution to estimate causal effects by maximizing the likelihood function with a linear relationship (*Xue et al., 2021*). MR-Egger provides estimates after accounting for possible horizontal pleiotropy discovered by its incorporated intercept test, albeit the estimates were frequently underpowered (*Bowden et al., 2016*). MR-PRESSO detects outliers that cause pleiotropy and generates estimates once these outlier SNPs are eliminated (*Verbanck et al., 2018*). The observed significant results were considered "robust" if the effect of sensitivity analyses was identical to that of IVW method, yielding a *p*-value < 0.05.

To gauge the individual influence of each variant, MVMR analysis with mutual adjustment was performed, followed by a correction for associated confounders (*Burgess and Thompson, 2015*). We have incorporated covariates, including the number of cigarettes smoked, fasting plasma glucose (FPG) levels, and body mass index (BMI) into the MVMR analysis, given that these factors could indirectly affect systemic immune responses and inflammation (*Liu et al., 2023*). The MVMR-IVW method was

utilized as the primary test, supplemented by the MVMR-least absolute shrinkage and selection operator (MVMR-LASSO) and the MVMR-Egger method (*Bowden et al., 2016*). The MVMR-LASSO regression yields dependable estimations for moderate-to-high degrees of heterogeneity or pleiotropy, and it also assists in alleviating the potential effects of multicollinearity among variables (*Grant and Burgess, 2021*).

The heterogeneity and horizontal pleiotropy of the results were quantified using Cochran's Q statistics and the intercept term in MR-Egger regression, respectively. The MR-Radial, a more sensitive method for outliers, would be employed to detect and remove outlier SNPs whenever heterogeneity or pleiotropy was discovered (*Bowden et al., 2018*). The leave-one-out (LOO) analysis and scatter plot were carried out to detect influential SNPs.

### **Bayesian model averaging**

As a multivariate framework for high-throughput risk factors based on non-linear regression, the MR-BMA was then employed to explore the leading traits responsible for outcome (*Zuber et al., 2020*). First, we used closed-form Bayes factors and independence priors to calculate the posterior probability (PP) and model-specific causal estimates (MSCE) of each variant. Next, the total PPs for all potential models were added up to determine the marginal probability of inclusion (MIP). The model-averaged causal estimate (MACE), which reflected the average direct effect of each metabolic trait on the outcomes, was also used to compare risk factors and interpret the directions. Finally, the best model was chosen preferably based on the ranking of each model's MIP and PP values. The Q-statistic and Cook's distance were used to identify invalid outliers and influential variants within the model. A genetic variant was defined as either an outlier or an influential variant if it possessed a q-value exceeding 10 or if its Cook's distance surpassed the median of the corresponding F-distribution. The MR-BMA would be repeated once unqualified variations were discovered (*Eledum, 2021*).

### **Transcriptome-wide association study**

We exploited the updated Genotype-Tissue Expression (GTEx) project Version 8 whole-blood data for transcriptome-wide association study (TWAS) analysis (*Gusev et al., 2016*). First, the functional summary-based imputation (FUSION) pipeline was used to infer the transcriptome associated with significant outcomes, among which the optimal gene expression model was chosen by comparing the

values of  $R^2$  provided by Bayesian sparse linear mixed models and multiple penalized linear regressions. A Bonferroni-corrected criterion of  $P < 6.27 \times 10^{-6}$  (0.05/7,890 genes) was adopted as a measure of statistical significance. Then, conditional analysis and permutation testing were implemented to assess the dependability and robustness of the gene transcript-trait relationships discovered through TWAS. Finally, we performed an expression quantitative trait locus (eQTL) colocalization analysis on TWAS-derived genes to determine whether the association was caused by a single causal SNP (PP.H4) or distinct causal SNPs (PP.H3).  $PP.H3 + PP.H4 > 0.8$  was considered significant evidence of colocalization (*Wallace, 2020*).

### Statistical analyses

Odds ratios (OR) with 95% confidence intervals (CI) were utilized to measure the influence of circulating immune cells on the likelihood of periodontitis. All statistical analyses were performed using "TwoSampleMR" (version 0.5.7), "MRPRESSO" (version 1.0), "RadialMR" (version 1.1), "coloc" (version 5.1.0.1), and "MVMR" (version 0.4) packages in R software (version 4.3.1).

## Results

### Selection of instrumental variables

A rigorous threshold of  $P < 1 \times 10^{-9}$  was applied to the database with an abundance of positive SNPs (as in the BCC consortium) to ensure the reliability of IVs. Otherwise, a relatively strict standard of  $P < 1 \times 10^{-6}$  was initially adopted (as in the Sardinian cohort), and we would loosen it at  $P < 5 \times 10^{-6}$  if less than three SNPs met this threshold (a basic requirement for MR-PRESSO analysis). As a result, a total of 1940 SNPs were selected as IVs in the present study (*Supplementary File 1* — Table s2). The F-statistics ranged from 28.67 to 220.07, indicating a low risk of weak instrument bias.

### Univariable Mendelian randomization

Three circulating immune cells were identified to be suggestively significant in the IVW method [OR: 1.09, 95% CI: 1.01-1.17,  $P = 0.030$  for Natural Killer T cells (NKT); OR: 1.11, 95% CI: 1.00-1.23,  $P = 0.042$  for neutrophils; OR: 1.13, 95% CI: 1.02-1.25,  $P = 0.025$  for plasmacytoid Dendritic Cells (pDC)], which were further supported by the maximum likelihood and MR-PRESSO (*Figure 2A,2B, Supplementary File 1* — Table s3). The MR-Egger regression revealed no evidence of horizontal pleiotropy ( $p$ -values for



intercept > 0.05). However, significant heterogeneity was detected in two traits (memory B cell and monocyte) (*Supplementary File 1* — Table s4), which faded after the removal of outliers (*Supplementary File 1* — Table s5, *Supplementary File 2* — Figure s1). Moreover, the LOO analysis showed no influential SNPs that were significantly linked with the outcome (*Supplementary File 2* — Figure s2). The observed significant results remained robust after removing pleiotropic SNPs (*Supplementary File 1* — Table s6, *Supplementary File 2* — Figure s3), and the scatter plot displayed a balance distribution amongst SNPs (*Figure 2C-2E*).

### **Multivariable Mendelian randomization**

After accounting for variable mutual adjustment and covariate correction for potential confounders, the causal relationship between circulating neutrophils and periodontitis remained stable with no evidence of heterogeneity or pleiotropy. NKT remained stable after modifying pDC and BMI, owing to the considerable heterogeneity of its impact on BMI; nonetheless, while the MR-LASSO analysis was used to make appropriate corrections, it was still advised to exercise caution when interacting with the effect. What's more, pDC maintained stability after adjusting for NKT, whereas the strength of the observed association was compromised in the MR-Egger sensitivity analysis (*Figure 3, Supplementary File 1* — Table s7).

### **Bayesian model averaging**

The best risk models and factors were ordered and prioritized based on their PP and MIP (*Table 2, Supplementary File 1* — Table s8). Consequently, we observed that neutrophil was the best model and leading factor for periodontitis (PP=0.771, MSCE=0.108, MIP=0.895, MACE=0.097), followed by NKT and pDC. The Cochran's Q test and Cook's distance failed to detect outlier or influential variations (*Supplementary File 2* — Figure s4).

### **Subgroup analysis and reverse Mendelian randomization**

A replication UVMR of three subgroups of periodontal diseases (chronic periodontitis, chronic gingivitis and gingival hyperplasia) was also performed in the FinnGen cohort (*Figure 4, Supplementary File 1* — Table s9-11). The significant findings identified within the GLIDE database, however, were not replicated during subgroup analysis, which may be attributed to the heterogeneity of periodontal disease, as well as variations in the population composition across datasets. Intriguingly, B cell was

discovered to be involved in the subgroups of the FinnGen population (OR: 1.11, 95% CI: 1.02-1.22,  $P = 0.019$  for chronic periodontitis; OR: 1.39, 95% CI: 1.02-1.88,  $P = 0.036$  for gingival hyperplasia). Reverse MR revealed no indication of reverse causality (*Figure 4, Supplementary File 1 — Table s12*).

### Transcriptome-wide association study

The TWAS indicated that five cross-trait genes, including *CC2D2B* (10q24.1), *RP11-326C3.7* (11p15.5), *USP3* (15q22.31), *HERC1* (15q22.31), and *AMFR* (16q13), may be implicated in the interaction of circulating immune cells with periodontitis (*Figure 5A, B*). After Bonferroni correction ( $P < 6.27 \times 10^{-6}$ ), we identified 658 of 3081 characteristics that were significantly associated with neutrophils, 5 of 443 with NKT, and 5 of 1038 with pDC. Within a broad criteria ( $P < 5 \times 10^{-4}$ ), we discovered 6 of 423 characteristics were linked to periodontitis (*Figure 5C, Supplementary File 2 — Figure s5*). Notably, four of these high-confidence genes were discovered to be involved with multiple phenotypes: *S100A9*, *S100A12* (neutrophils and periodontitis); *MCM6*, *P14KAP2* (neutrophils and pDC) (*Table 3, Figure 5D*). Most of these significant features survived both conditional analysis and permutation testing (381/658 for neutrophils, 3/5 for NKT, 5/5 for pDC, and 5/6 for periodontitis). The majority of them were shown to be colocalized with their respective phenotype (554/658 for neutrophils, 4/5 for NKT, 3/5 for pDC, 0/6 for periodontitis), implying that shared and pleiotropic SNPs influence both gene expression and phenotype (*Supplementary File 1 — Table s13-16*).

## Discussion

### Summary of key findings

In the present research, we employed MR to explore the potential links between circulating immune cells and periodontitis. Our study revealed causal relationships between elevated levels of circulating neutrophils, Natural Killer T cells, and plasmacytoid Dendritic Cells with a higher risk of periodontitis. TWAS and colocalization analysis demonstrated possible high-confidence and cross-trait genes to be engaged in their interaction.

### Circulating neutrophils play a significant part in periodontitis and inflammatory comorbidities

Notably, our findings suggested that circulating neutrophils may play a leading causal role in the

likelihood of periodontitis, and it remained robust after correcting for potential confounding factors and outliers. Neutrophils are abundant and short-lived myeloid cells that can be rapidly recruited to inflammatory sites, serving as the first line of defense against infections and other host insults. In recent years, a profound understanding of the role of neutrophils in chronic inflammatory diseases has been gained, where they may directly act as effectors of destructive inflammation. However, a scarcity of neutrophils can also trigger destructive tissue inflammation, their pivotal role in maintaining physiological equilibrium (*Ley et al., 2018*). Numerous pieces of clinical evidence have uncovered that neutrophils account for a significant portion of inflammatory tissue damage and that the severity of periodontitis is positively correlated with the overproduction, dysregulation, or hyperactivity of neutrophils (*Chapple et al., 2023; Fine et al., 2021*). A case-control study indicated that periodontitis patients suffered from a higher level of apoptotic circulatory neutrophils than healthy people (*Nicu et al., 2018*). An increased neutrophil count could suggest the inflammatory burden of gingivitis and dental plaque in the oral cavity (*Sreenivasan and Prasad, 2022*). Another study discovered that neutrophil depletion ameliorated experimental periodontitis while unrestrained recruitment aggravated it (*Dutzan et al., 2018*).

Neutrophil-mediated inflammatory responses are crucial in the pathogenesis of periodontitis, influencing not only its localized manifestation but also its systemic complications, thereby associating it with a broad spectrum of inflammatory complications (*Hajishengallis and Chavakis, 2021*). During periodontitis, neutrophils act as the primary defense against bacteremia, with their primary function being to engulf and eradicate these bacteria, thus inhibiting their dissemination within the body. Following this, neutrophils liberally release pro-inflammatory cytokines in the connective tissue adjacent to the periodontal pocket. It is plausible that these cytokines could permeate into the bloodstream, thereby potentially exacerbating systemic inflammation (*D'Aiuto et al., 2013*). In severe periodontitis cases, patients experience low-grade systemic inflammation, as indicated by elevated levels of neutrophils and pro-inflammatory mediators, compared to their healthy counterparts (*Schenkein et al., 2020*). Preclinical research also indicates that ligature-induced periodontitis (LIP) is accompanied by an elevation in circulating neutrophil counts, resulting in endothelial dysfunction and vascular inflammation (*Brito et al., 2013*). The quantity and functionality of neutrophils both act as critical indicators of inflammation severity. The reduction in neutrophil count and inflammatory

mediators, observed after successful periodontitis treatment, suggests a reduction in systemic inflammation (*Hajishengallis , 2022*).

The recently developed concept of "trained immunity" has introduced new perspectives in understanding how neutrophils contribute to periodontitis and its comorbidities. "Trained Immunity" primarily denotes the memory-like response of myeloid innate immune cells, such as neutrophils and monocytes, to pathogens following an initial infection (*Li et al., 2022*). Contrary to the memory response of specific immune cells, the memory characteristic of trained immunity primarily manifests as a rapid response and efficient elimination of pathogens, rather than specific recognition (*Netea et al., 2016*). Trained myeloid cells have the potential to amplify the functionality of neutrophils, thereby fortifying the body's defense against subsequent infections. Nevertheless, within the framework of chronic inflammation, these cells could potentially intensify tissue damage (*Hajishengallis and Chavakis, 2022*).

Periodontitis exemplifies a condition that stimulates maladaptive myelopoiesis in the bone marrow, characterized by the production of an excessive number of hyper-inflammatory monocytes and neutrophils (*Li et al., 2023*). This leads to an influx of maladaptively trained neutrophils in both the blood circulation and periodontal tissues, that infiltrate not only oral tissues but also non-oral ones, simultaneously triggering an increase in the production of Neutrophil Extracellular Traps (NETs) and a reduction in their degradation (*White et al., 2016*). This process, as a result, intensifies the collapse of the epithelial barrier, fosters bacteremia, exacerbates periodontitis, and amplifies the severity of inflammatory complications (*Burmeister et al., 2022*). While our comprehension of the regulatory mechanisms and functions of neutrophils is far from complete, current research has facilitated the development of targeted therapeutic strategies to manage chronic inflammatory disorders mediated by neutrophils, such as the inflammatory response observed in periodontitis.

### **Several lymphocyte subsets causally associated with the risk of periodontitis**

NKT cells, a distinct fraction of T lymphocytes, are linked to the pathophysiology of a variety of inflammatory, osteolytic, and autoimmune diseases (*Godfrey et al., 2000*). Similar to our findings, previous research revealed a greater number of NKT recruited in periodontitis tissues (*Muthukuru, 2012; Yamazaki et al., 2001*). Several studies have demonstrated the tissue-specific function of NKT and highlighted its pathogenic role in periodontitis (*Aoki-Nonaka et al., 2014; Melgar-Rodríguez et al.,*

2021), which may be attributed to the proinflammatory and immunoregulatory activities mediated by NKT, spanning from cytokine production to immune cell interactions (*Seidel et al., 2020*).

In addition, our study identified a convoluted causal relationship between pDC and periodontitis. Dendritic Cells, as specialized antigen-presenting cells, play a crucial role in the modulation of the host immune response and may be related to bone loss during periodontitis (*El-Awady et al., 2022; Ginesin et al., 2023*). In response to viral encounters and infection, pDC represents a unique subgroup of DC that releases type I interferon (IFN) (*Jego et al., 2003*). However, pDC is only discovered in a tiny percentage of healthy oral tissues, and there remains a dearth of relevant clinical research (*Meghil and Cutler, 2020; Wilensky et al., 2014*). The involvement of pDC in periodontitis deserves further investigation.

### **Systemic immunomodulation management for immune cells serves as a target for periodontal care**

Periodontitis is a damaging inflammatory disease induced and exacerbated by the plaque biofilm and host immune response (*Moutsopoulos and Konkel, 2018*). The systemic immune response comprises both innate and adaptive immunity, with numerous cytokines, immune cells, and inflammatory pathways interacting in a complex crosstalk during periodontitis, hinting that immunomodulation management may be an essential target for periodontal care (*Dutzan et al., 2016; Hajishengallis, 2014*).

Reactive periodontal therapies, which focus on plaque management, pocket depth reduction, and gingival bleeding eradication, do not always produce the intended results and fall short of a genuinely comprehensive approach to dental care (*Kornman et al., 2017*). Recently, a promising term "P4 periodontics" (Predictive, Preventive, Personalized, and Participatory) has been introduced as a multilayer healthcare paradigm for the management of periodontitis, emphasizing the personalized responsiveness of treatment to disease (*Bartold and Ivanovski, 2022*). Modulation of systemic host immune responses is particularly appropriate for predicting the progression and severity of periodontitis in persons whose periodontal condition is only slightly correlated with dental plaque (*Divaris et al., 2020*). MR contributes a novel approach to the investigation of systemic immunological alternations in periodontitis. A recent MR study evaluated the causal associations between circulating cytokines and the risk of periodontitis (*Huang et al., 2023*).

Our present study highlighted five genes (*USP3, AMFR, HERC1, CC2D2B, and RP11-326C3.7*) that

may play a pivotal role in the communication between circulating neutrophils, pDC, NKT, and periodontitis, as well as two high confidence genes (*S100A9*, *S100A12*) situated within 1q21.3 as prospective gene targets for regulating circulating neutrophils during periodontitis. Our findings could pave the way for a novel preventive and therapeutic approach to modifying the systemic immunological equilibrium in periodontitis patients by modulating circulating immune cells. These findings may enable the prediction of individuals at risk of periodontitis through screening certain immune imbalances, which might then be employed to specifically prevent periodontitis and related inflammatory comorbidities, particularly in patients with systemic susceptibility factors.

### **Strengths and limitations in the present study**

The present study exhibited several strengths. First, under the premise of three key assumptions, MR is a powerful tool for explaining the relationship between complicated features (such as circulating immune cells) by successfully mitigating the effect of probable confounders and allowing for reasonable causal order. Second, a rigorous quality control process was conducted in accordance with the STROBE-MR checklist in multiple domains, including IVs selection, heterogeneity investigations, and removal of pleiotropic loci. Third, we adopted a series of sensitivity tests and MVMR to rule out the impact of outlier, influential, or pleiotropic SNPs. Fourth, a novel method based on nonlinear Bayesian averaging was applied to explore the causal drivers of disease risk from a set of high-throughput risk factors. Finally, TWAS was used in conjunction with MR to identify achievable regulatory gene targets for periodontal care.

However, some limitations should be addressed when interpreting the results. To begin with, a scarcity of GWAS databases hampered more comprehensive and precise analyses. As a result, we were unable to evaluate the impact of immune cells on distinct subsets of periodontal illnesses (such as gingival recession, and periodontal abscess) or ethnic groups (such as East Asian and African). Second, the primary results from the IVW method were not stable across all alternative analyses, nor were they replicated within subgroups, implying that the findings had limited evidentiary power. Third, the considerable variation in sample size between the two exposure databases contributes to the discrepancies in the number of positive SNPs. Despite our exploration of multiple selection thresholds for IVs, the inconsistency in screening methods and the discrepancy in the included SNPs could potentially introduce bias. Fourth, none of the results satisfied the Bonferroni correction ( $P < 0.05/17$

traits = 0.003), which may have inflated the rate of type I errors. Fifth, in spite of our best attempts to minimize potential confounding factors, interferences from unobserved pleiotropies could not be completely ruled out. Fifth, we relied on the whole blood data For FUSION algorithm due to the lack of transcriptome data associated with oral tissues (such as gums, oral mucosa, and alveolar bone) in the GTEx database. This has led to an excessive focus on systemic immunological changes, thereby overlooking the significance of alterations in local periodontal tissue immunity. Such an oversight could potentially compromise the precision and pertinence of our research findings. Sixth, in addition to quantities, function abnormalities (such as dysregulation or hyperactivity) of circulating immune cells may also be related to the susceptibility and severity of periodontitis, however our research failed to address this issue. Seventh, while the majority of immune cells in gingival crevicular fluid are derived from blood, the amount of circulating immune cells is influenced by more intricate factors, which may challenge the current causal inference. Finally, since MR evaluates causal inference from the standpoint of genetic variations, it may not always correspond exactly to fact.

## Conclusions

In conclusion, the present study provides suggestive evidence of the causal associations of genetically predicted circulating neutrophils, Natural Killer T cells, and plasmacytoid Dendritic Cells on the risk of periodontitis, which shed light on the involvement of systemic immunological alterations in periodontitis etiology. Our findings may provide an innovative and evidence-based framework for the prospect of systemic immunomodulation management in periodontal care, which can be valuable for early diagnostics, risk assessment, targeted prevention, and personalized management of periodontitis, especially for patients with systemic susceptibility factors. However, the effect estimation discovered in our study was marginal, prompting caution when transferring to clinical practice. More studies are required to comprehend the biological plausibility and clinical applicability of our findings.

## Acknowledgements

We would like to acknowledge all the GWASs for making the summary data publicly available, and we

appreciate all the investigators and participants who contributed to those studies. We appreciate the BioRender's convenience in drawing Figure 1 (<https://www.biorender.com>).

## Additional information

### Competing interests

The authors declare no competing interests.

### Funding

| <b>Funder</b>                                                     | <b>Grant reference number</b>   | <b>Author</b>            |
|-------------------------------------------------------------------|---------------------------------|--------------------------|
| Fundamental Research Funds for the Central Universities           | 226-2023-00121 & 226-2022-00213 | Zhiyong Wang & Shan Wang |
| National Major Science and Technology Projects of China           | 81991500 & 81991502             | Qianming Chen            |
| Zhejiang University Global Partnership Fund                       | 188170 & 194452307/004          | Zhiyong Wang             |
| Joint Funds of the Zhejiang Provincial Natural Science Foundation | LHDMD23H300001                  | Shan Wang                |

### Author contributions

Xinjian Ye, Yijing Bai, Bin Liu, Shan Wang, Zhiyong Wang, Weiyi Pan, Conceptualization, Visualization; Xinjian Ye, Yijing Bai, Yitong Chen, Yuwei Dai, Formal analysis, Methodology; Data analysis: Xinjian Ye, Yijing Bai, Yuhang Ye, Mengjun Li, Data curation; Xinjian Ye, Yijing Bai, Yuhang Ye, Yitong Chen, Writing - original draft; Yingying Mao, Qianming Chen, Conceptualization, Supervision, Funding acquisition, Writing - review and editing. All of the co-authors have approved the submitted final version and agreed to the publication.

### Author ORCIDs

Xinjian Ye <https://orcid.org/0000-0003-2300-6117>

Yijing Bai <https://orcid.org/0000-0002-2917-0156>

Qianming Chen <https://orcid.org/0000-0002-5371-4432>



## Ethics

Ethics approval and consent to participate are not applicable.

## Additional files

### Supplementary files

#### **Supplementary File 1.** Tables s1-16.

Table s1. Case definition and exclusion criteria in included GWASs.

Table s2. Characteristics of the SNPs used as IVs in the MR.

Table s3. Effect estimates of causal associations between circulating immune cells and periodontitis risk.

Table s4. The heterogeneity and horizontal pleiotropy of the main results using Cochran's Q statistics and MR-Egger intercept.

Table s5. Effect estimates of causal associations after excluding outliers in RadialMR for two features with considerable heterogeneity.

Table s6. Effect estimates of causal associations after excluding influential or outlier SNPs for significant results.

Table s7. Effect estimates of causal associations after mutual and covariate correction in MVMR.

Table s8. Ranking of models according to their PP using MR-BMA analysis.

Table s9-11. Effect estimates of causal associations between circulating immune cells and chronic periodontitis, chronic gingivitis, and gingival hyperplasia in subgroup analysis.

Table s12. Effect estimates of the reverse associations between periodontitis and circulating immune cells.

Table s13-16. Results of TWAS, conditional analysis, permutation testing and colocalization analysis on neutrophil, Natural Killer T cell, plasmacytoid DC and periodontitis.

#### **Supplementary File 2.** Figures s1-5.

Figure s1. Scatter plot to explore outliers for two features with considerable heterogeneity.

Figure s2. Results of leave-one-out sensitivity analysis.

Figure s3. Scatter plot to explore outliers for significant results.

Figure s4. Scatter plot of the Cochran's Q test and Cook's distance to explore outlier or influential variations in MR-BMA.

Figure s5. Results of the TWAS and colocalization analysis.

#### **Supplementary File 3.** STROBE-MR Checklist.

### Data availability

Data from GLIDE can be obtained via application (<https://data.bris.ac.uk/data/dataset/>), FinnGen can be obtained via application (<https://finngen.gitbook.io/documentation/v/r9/data-download>), and GTEx can be obtained via application (<https://gtexportal.org/home>). The data generated or analysed during this study are available in this published article and its supplementary information files. The data used in the study could be requested through the corresponding author with reasonable request.

### Code availability

The software and code used in the study could be obtained through the corresponding author.

## References

- Aoki-Nonaka Y**, Nakajima T, Miyauchi S, Miyazawa H, Yamada H, Domon H, Tabeta K, Yamazaki K. 2014. Natural Killer T cells mediate alveolar bone resorption and a systemic inflammatory response in response to oral infection of mice with *Porphyromonas gingivalis*. *Journal of Periodontal Research* **49**:69–76. DOI: <https://doi.org/10.1111/jre.12080>, PMID: 23586756
- Bartold PM**, Ivanovski S. 2022. P4 Medicine as a model for precision periodontal care. *Clinical Oral Investigations* **26**:5517–5533. DOI: <https://doi.org/10.1007/s00784-022-04469-y>, PMID: 35344104
- Bowden J**, Del Greco M. F, Minelli C, Davey Smith G, Sheehan NA, Thompson JR. 2016. Assessing the suitability of summary data for two-sample Mendelian randomization analyses using MR-Egger regression: the role of the I<sup>2</sup> statistic. *International Journal of Epidemiology* **45**:1961–1974. DOI: <https://doi.org/10.1093/ije/dyw220>, PMID: 27616674
- Bowden J**, Spiller W, Del Greco M F, Sheehan N, Thompson J, Minelli C, Davey Smith G. 2018. Improving the visualization, interpretation and analysis of two-sample summary data Mendelian randomization via the Radial plot and Radial regression. *International Journal of Epidemiology* **47**:2100. DOI: <https://doi.org/10.1093/ije/dyy265>, PMID: 30423109
- Brito LCW**, DaBó S, Striechen TM, Farias JM, Olchanheski LR, Mendes RT, Velloso JCR, Fávero GM, Sordi R, Assreuy J, Santos FA, Fernandes D. 2013. Experimental periodontitis promotes transient vascular inflammation and endothelial dysfunction. *Archives of Oral Biology* **58**:1187–1198. DOI: <https://doi.org/10.1016/j.archoralbio.2013.03.009>, PMID: 23583017
- Burgess S**, Thompson SG. 2015. Multivariable Mendelian randomization: the use of pleiotropic genetic variants to estimate causal effects. *American Journal of Epidemiology* **181**:251–260. DOI: <https://doi.org/10.1093/aje/kwu283>, PMID: 25632051
- Burmeister A**, Vidal-Y-Sy S, Liu X, Mess C, Wang Y, Konwar S, Tschongov T, Häffner K, Huck V, Schneider SW, Gorzelanny C. 2022. Impact of neutrophil extracellular traps on fluid properties, blood flow and complement activation. *Frontiers in Immunology* **13**:1078891. DOI: <https://doi.org/10.3389/fimmu.2022.1078891>, PMID: 36591269
- Cekici A**, Kantarci A, Hasturk H, Van Dyke TE. 2014. Inflammatory and immune pathways in the pathogenesis of periodontal disease. *Periodontology 2000* **64**:57–80. DOI: <https://doi.org/10.1111/prd.12002>, PMID: 24320956
- Chapple ILC**, Hirschfeld J, Kantarci A, Wilensky A, Shapira L. 2023. The role of the host-Neutrophil biology. *Periodontology 2000*. DOI: <https://doi.org/10.1111/prd.12490>, PMID: 37199393
- Curtis MA**, Diaz PI, Van Dyke TE. 2020. The role of the microbiota in periodontal disease. *Periodontology 2000* **83**:14–25. DOI: <https://doi.org/10.1111/prd.12296>, PMID: 32385883
- D’Aiuto F**, Orlandi M, Gunsolley JC. 2013. Evidence that periodontal treatment improves biomarkers and CVD outcomes. *Journal Of Clinical Periodontology* **40 Suppl 14**:S85–105. DOI: <https://doi.org/10.1111/jcpe.12061>, PMID: 23627337
- Davies NM**, Holmes MV, Smith GD. 2018. Reading Mendelian randomisation studies: a guide, glossary, and checklist for clinicians. *BMJ (Clinical research ed.)* **362**:k601. DOI: <https://doi.org/10.1136/bmj.k601>, PMID: 30002074
- Demoersman J**, Pochard P, Framery C, Simon Q, Boisramé S, Soueidan A, Pers J-O. 2018. B cell subset distribution is altered in patients with severe periodontitis. *PLoS One* **13**:e0192986. DOI: <https://doi.org/10.1371/journal.pone.0192986>, PMID: 29447240
- Divaris K**, Moss K, Beck JD. 2020. Biologically informed stratification of periodontal disease holds the key to achieving precision oral health. *Journal of Periodontology* **91 Suppl 1**:S50–S55. DOI: <https://doi.org/10.1002/JPER.20-0096>, PMID: 32432812
- Dutzan N**, Kajikawa T, Abusleme L, Greenwell-Wild T, Zuazo CE, Ikeuchi T, Brenchley L, Abe T, Hurabielle C,

- Martin D, Morell RJ, Freeman AF, Lazarevic V, Trinchieri G, Diaz PI, Holland SM, Belkaid Y, Hajishengallis G, Moutsopoulos NM. 2018. A dysbiotic microbiome triggers TH17 cells to mediate oral mucosal immunopathology in mice and humans. *Science Translational Medicine* **10**:eaat0797. DOI: <https://doi.org/10.1126/scitranslmed.aat0797>, PMID: 30333238
- Dutzan N, Konkel JE, Greenwell-Wild T, Moutsopoulos NM. 2016. Characterization of the human immune cell network at the gingival barrier. *Mucosal Immunology* **9**:1163–1172. DOI: <https://doi.org/10.1038/mi.2015.136>, PMID: 26732676
- El-Awady AR, Elashiry M, Morandini AC, Meghil MM, Cutler CW. 2022. Dendritic Cells a critical link to alveolar bone loss and systemic disease risk in periodontitis: Immunotherapeutic implications. *Periodontology 2000* **89**:41–50. DOI: <https://doi.org/10.1111/prd.12428>, PMID: 35244951
- Eledum H. 2021. Leverage and influential observations on the Liu type estimator in the linear regression model with the severe collinearity. *Heliyon* **7**:e07792. DOI: <https://doi.org/10.1016/j.heliyon.2021.e07792>, PMID: 34458624
- Fine N, Chadwick JW, Sun C, Parbhakar KK, Khoury N, Barbour A, Goldberg M, Tenenbaum HC, Glogauer M. 2021. Periodontal Inflammation Primes the Systemic Innate Immune Response. *Journal of Dental Research* **100**:318–325. DOI: <https://doi.org/10.1177/0022034520963710>, PMID: 33078669
- Genco RJ, Sanz M. 2020. Clinical and public health implications of periodontal and systemic diseases: An overview. *Periodontology 2000* **83**:7–13. DOI: <https://doi.org/10.1111/prd.12344>, PMID: 32385880
- Ginesin O, Mayer Y, Gabay E, Rotenberg D, Machtei EE, Coyac BR, Bar-On Y, Zigdon-Giladi H. 2023. Revealing leukocyte populations in human peri-implantitis and periodontitis using flow cytometry. *Clinical Oral Investigations*. DOI: <https://doi.org/10.1007/s00784-023-05168-y>, PMID: 37490117
- Godfrey DI, Hammond KJ, Poulton LD, Smyth MJ, Baxter AG. 2000. NKT cells: facts, functions and fallacies. *Immunology Today* **21**:573–583. DOI: [https://doi.org/10.1016/s0167-5699\(00\)01735-7](https://doi.org/10.1016/s0167-5699(00)01735-7), PMID: 11094262
- Golubnitschaja O, Kinkorova J, Costigliola V. 2014. Predictive, Preventive and Personalised Medicine as the hardcore of “Horizon 2020”: EPMA position paper. *The EPMA journal* **5**:6. DOI: <https://doi.org/10.1186/1878-5085-5-6>, PMID: 24708704
- Gormley M, Dudding T, Thomas SJ, Tyrrell J, Ness AR, Pring M, Legge D, Davey Smith G, Richmond RC, Vincent EE, Bull C. 2023. Evaluating the effect of metabolic traits on oral and oropharyngeal cancer risk using Mendelian randomization. *Elife* **12**:e82674. DOI: <https://doi.org/10.7554/eLife.82674>, PMID: 37042641
- Grant AJ, Burgess S. 2021. Pleiotropy robust methods for multivariable Mendelian randomization. *Statistics in Medicine* **40**:5813–5830. DOI: <https://doi.org/10.1002/sim.9156>, PMID: 34342032
- Gusev A, Ko A, Shi H, Bhatia G, Chung W, Penninx BW, Jansen R, de Geus EJ, Boomsma DI, Wright FA, Sullivan PF, Ninkola E, Alvarez M, Civelek M, Lusi AJ, Lehtimäki T, Raitoharju E, Kähönen M, Seppälä I, Raitakari OT, et al. 2016. Integrative approaches for large-scale transcriptome-wide association studies. *Nature Genetics* **48**:245–252. DOI: <https://doi.org/10.1038/ng.3506>, PMID: 26854917
- Hajishengallis G. 2020. New developments in neutrophil biology and periodontitis. *Periodontology 2000* **82**:78–92. DOI: <https://doi.org/10.1111/prd.12313>, PMID: 31850633
- Hajishengallis G. 2014. Immunomicrobial pathogenesis of periodontitis: keystones, pathobionts, and host response. *Trends in Immunology* **35**:3–11. DOI: <https://doi.org/10.1016/j.it.2013.09.001>, PMID: 24269668
- Hajishengallis G, Chavakis T. 2022. Mechanisms and Therapeutic Modulation of Neutrophil-Mediated Inflammation. *J Dent Res* **101**:1563–1571. DOI: <https://doi.org/10.1177/00220345221107602>, PMID: 35786033
- Hajishengallis G, Chavakis T. 2021. Local and systemic mechanisms linking periodontal disease and inflammatory comorbidities. *Nature Reviews Immunology* **21**:426–440. DOI: <https://doi.org/10.1038/s41577-020-00488-6>, PMID: 33510490
- Hajishengallis G, Korostoff JM. 2017. Revisiting the Page & Schroeder model: the good, the bad and the unknowns in the periodontal host response 40 years later. *Periodontology 2000* **75**:116–151. DOI: <https://doi.org/10.1111/prd.12181>, PMID: 28758305

- Hajishengallis G, Li X, Divaris K, Chavakis T. 2022. Maladaptive Trained Immunity and Clonal Hematopoiesis as Potential Mechanistic Links Between Periodontitis and Inflammatory Comorbidities. *Periodontol 2000* **89**:215–230. DOI: <https://doi.org/10.1111/prd.12421>, PMID: 35244943
- Huang S-J, Li R, Xu S, Liu Y, Li S-H, Duan S-Z. 2023. Assessment of bidirectional relationships between circulating cytokines and periodontitis: Insights from a mendelian randomization analysis. *Frontiers in Genetics* **14**:1124638. DOI: <https://doi.org/10.3389/fgene.2023.1124638>, PMID: 36793899
- Jego G, Palucka AK, Blanck J-P, Chalouni C, Pascual V, Banchereau J. 2003. Plasmacytoid Dendritic Cells induce plasma cell differentiation through type I interferon and interleukin 6. *Immunity* **19**:225–234. DOI: [https://doi.org/10.1016/s1074-7613\(03\)00208-5](https://doi.org/10.1016/s1074-7613(03)00208-5), PMID: 12932356
- Julian TH, Cooper-Knock J, MacGregor S, Guo H, Aslam T, Sanderson E, Black GCM, Sergouniotis PI. 2023. Phenome-wide Mendelian randomisation analysis identifies causal factors for age-related macular degeneration. *Elife* **12**:e82546. DOI: <https://doi.org/10.7554/eLife.82546>, PMID: 36705323
- Kassebaum NJ, Bernabé E, Dahiya M, Bhandari B, Murray CJL, Marcenes W. 2014. Global burden of severe periodontitis in 1990-2010: a systematic review and meta-regression. *Journal of Dental Research* **93**:1045–1053. DOI: <https://doi.org/10.1177/0022034514552491>, PMID: 25261053
- Kornman KS, Giannobile WV, Duff GW. 2017. Quo vadis: what is the future of periodontics? How will we get there? *Periodontology 2000* **75**:353–371. DOI: <https://doi.org/10.1111/prd.12217>, PMID: 28758298
- Kurki MI, Karjalainen J, Palta P, Sipilä TP, Kristiansson K, Donner KM, Reeve MP, Laivuori H, Aavikko M, Kaunisto MA, Loukola A, Lahtela E, Mattsson H, Laiho P, Della Briotta Parolo P, Lehisto AA, Kanai M, Mars N, Rämö J, Kiiskinen T, et al. 2023. FinnGen provides genetic insights from a well-phenotyped isolated population. *Nature* **613**:508–518. DOI: <https://doi.org/10.1038/s41586-022-05473-8>, PMID: 36653562
- Lamont RJ, Hajishengallis G. 2015. Polymicrobial synergy and dysbiosis in inflammatory disease. *Trends in Molecular Medicine* **21**:172–183. DOI: <https://doi.org/10.1016/j.molmed.2014.11.004>, PMID: 25498392
- Ley K, Hoffman HM, Kubes P, Cassatella MA, Zychlinsky A, Hedrick CC, Catz SD. 2018. Neutrophils: New insights and open questions. *Science Immunology* **3**:eaat4579. DOI: <https://doi.org/10.1126/sciimmunol.aat4579>, PMID: 30530726
- Li X, Wang H, Yu X, Saha G, Kalafati L, Ioannidis C, Mitroulis I, Netea MG, Chavakis T, Hajishengallis G. 2022. Maladaptive innate immune training of myelopoiesis links inflammatory comorbidities. *Cell* **185**:1709–1727.e18. DOI: <https://doi.org/10.1016/j.cell.2022.03.043>, PMID: 35483374
- Li Y, Chen Y, Cai G, Ni Q, Geng Y, Wang T, Bao C, Ruan X, Wang H, Sun W. 2023. Roles of trained immunity in the pathogenesis of periodontitis. *Journal of Periodontal Research*. DOI: <https://doi.org/10.1111/jre.13158>, PMID: 37424315
- Liu Y, Lai H, Zhang R, Xia L, Liu L. 2023. Causal relationship between gastro-esophageal reflux disease and risk of lung cancer: insights from multivariable Mendelian randomization and mediation analysis. *International Journal of Epidemiology* **52**:1435–1447. DOI: <https://doi.org/10.1093/ije/dyad090>, PMID: 37344162
- Ma X, Wang Y, Wu H, Li F, Feng X, Xie Y, Xie D, Wang W, Lo ECM, Lu H. 2021. Periodontal health related-inflammatory and metabolic profiles of patients with end-stage renal disease: potential strategy for predictive, preventive, and personalized medicine. *The EPMA journal* **12**:117–128. DOI: <https://doi.org/10.1007/s13167-021-00239-0>, PMID: 33903806
- Meghil MM, Cutler CW. 2020. Oral Microbes and Mucosal Dendritic Cells, “Spark and Flame” of Local and Distant Inflammatory Diseases. *International Journal of Molecular Sciences* **21**:1643. DOI: <https://doi.org/10.3390/ijms21051643>, PMID: 32121251
- Melgar-Rodríguez S, Cafferata EA, Díaz NI, Peña MA, González-Osuna L, Rojas C, Sierra-Cristancho A, Cárdenas AM, Díaz-Zúñiga J, Vernal R. 2021. Natural Killer T (NKT) Cells and Periodontitis: Potential Regulatory Role of NKT10 Cells. *Mediators of Inflammation* **2021**:5573937. DOI: <https://doi.org/10.1155/2021/5573937>, PMID: 34594157
- Moutsopoulos NM, Konkel JE. 2018. Tissue-Specific Immunity at the Oral Mucosal Barrier. *Trends in*

- Immunology* **39**:276–287. DOI: <https://doi.org/10.1016/j.it.2017.08.005>, PMID: 28923364
- Muthukuru M. 2012. Technical Advance: Decreased helper T cells and increased Natural Killer cells in chronic periodontitis analyzed by a novel method for isolating resident lymphocytes. *Journal of Leukocyte Biology* **92**:683–692. DOI: <https://doi.org/10.1189/jlb.0212103>, PMID: 22649205
- Nair S, Faizuddin M, Dharmapalan J. 2014. Role of autoimmune responses in periodontal disease. *Autoimmune Diseases* **2014**:596824. DOI: <https://doi.org/10.1155/2014/596824>, PMID: 24963400
- Netea MG, Domínguez-Andrés J, Barreiro LB, Chavakis T, Divangahi M, Fuchs E, Joosten LAB, van der Meer JWM, Mhlanga MM, Mulder WJM, Riksen NP, Schlitzer A, Schultze JL, Stabell Benn C, Sun JC, Xavier RJ, Latz E. 2020. Defining trained immunity and its role in health and disease. *Nature Reviews Immunology* **20**:375–388. DOI: <https://doi.org/10.1038/s41577-020-0285-6>, PMID: 32132681
- Netea MG, Joosten LAB, Latz E, Mills KHG, Natoli G, Stunnenberg HG, O’Neill LAJ, Xavier RJ. 2016. Trained immunity: A program of innate immune memory in health and disease. *Science (New York, N.Y.)* **352**:aaf1098. DOI: <https://doi.org/10.1126/science.aaf1098>, PMID: 27102489
- Nicu EA, Rijkschroeff P, Wartewig E, Nazmi K, Loos BG. 2018. Characterization of oral polymorphonuclear neutrophils in periodontitis patients: a case-control study. *BMC Oral Health* **18**:149. DOI: <https://doi.org/10.1186/s12903-018-0615-2>, PMID: 30143044
- Noz MP, Plachokova AS, Smeets EMM, Aarntzen EHJG, Bekkering S, Vart P, Joosten LAB, Netea MG, Riksen NP. 2021. An Explorative Study on Monocyte Reprogramming in the Context of Periodontitis In Vitro and In Vivo. *Frontiers in Immunology* **12**:695227. DOI: <https://doi.org/10.3389/fimmu.2021.695227>, PMID: 34484192
- Orihuela-Campos RC, Tamaki N, Mukai R, Fukui M, Miki K, Terao J, Ito H-O. 2015. Biological impacts of resveratrol, quercetin, and N-acetylcysteine on oxidative stress in human gingival fibroblasts. *Journal of Clinical Biochemistry and Nutrition* **56**:220–227. DOI: <https://doi.org/10.3164/jcbn.14-129>, PMID: 26060353
- Orrù V, Steri M, Sidore C, Marongiu Michele, Serra V, Olla S, Sole G, Lai S, Dei M, Mulas A, Viridis F, Piras MG, Lobina M, Marongiu Mara, Pitzalis M, Deidda F, Loizedda A, Onano S, Zoledziewska M, Sawcer S, et al. 2020. Complex genetic signatures in immune cells underlie autoimmunity and inform therapy. *Nature Genetics* **52**:1036–1045. DOI: <https://doi.org/10.1038/s41588-020-0684-4>, PMID: 32929287
- Papadimitriou N, Dimou N, Tsilidis KK, Banbury B, Martin RM, Lewis SJ, Kazmi N, Robinson TM, Albanes D, Aleksandrova K, Berndt SI, Timothy Bishop D, Brenner H, Buchanan DD, Bueno-de-Mesquita B, Campbell PT, Castellvi-Bel S, Chan AT, Chang-Claude J, Ellingjord-Dale M, et al. 2020. Physical activity and risks of breast and colorectal cancer: a Mendelian randomisation analysis. *Nature Communications* **11**:597. DOI: <https://doi.org/10.1038/s41467-020-14389-8>, PMID: 32001714
- Peres MA, Macpherson LMD, Weyant RJ, Daly B, Venturelli R, Mathur MR, Listl S, Celeste RK, Guarnizo-Herreño CC, Kearns C, Benzian H, Allison P, Watt RG. 2019. Oral diseases: a global public health challenge. *Lancet (London, England)* **394**:249–260. DOI: [https://doi.org/10.1016/S0140-6736\(19\)31146-8](https://doi.org/10.1016/S0140-6736(19)31146-8), PMID: 31327369
- Sanderson E, Glymour MM, Holmes MV, Kang H, Morrison J, Munafò MR, Palmer T, Schooling CM, Wallace C, Zhao Q, Davey Smith G. 2022. Mendelian randomization. *Nature Reviews Methods Primers* **2**:1–21. DOI: <https://doi.org/10.1038/s43586-021-00092-5>, PMID: 37325194
- Schenkein HA, Papapanou PN, Genco R, Sanz M. 2020. Mechanisms underlying the association between periodontitis and atherosclerotic disease. *Periodontology 2000* **83**:90–106. DOI: <https://doi.org/10.1111/prd.12304>, PMID: 32385879
- Seidel A, Seidel CL, Weider M, Junker R, Gözl L, Schmetzer H. 2020. Influence of Natural Killer Cells and Natural Killer T Cells on Periodontal Disease: A Systematic Review of the Current Literature. *International Journal of Molecular Sciences* **21**:9766. DOI: <https://doi.org/10.3390/ijms21249766>, PMID: 33371393
- Shungin D, Haworth S, Divaris K, Agler CS, Kamatani Y, Keun Lee M, Grinde K, Hindy G, Alaraudanjoki V, Pesonen P, Teumer A, Holtfreter B, Sakaue S, Hirata J, Yu Y-H, Ridker PM, Giulianini F, Chasman DI, Magnusson PKE, Sudo T, et al. 2019. Genome-wide analysis of dental caries and periodontitis combining clinical and self-reported data. *Nature Communications* **10**:2773. DOI: <https://doi.org/10.1038/s41467-019-10630-1>, PMID: 31235808

- Skrivankova VW**, Richmond RC, Woolf BAR, Davies NM, Swanson SA, VanderWeele TJ, Timpson NJ, Higgins JPT, Dimou N, Langenberg C, Loder EW, Golub RM, Egger M, Davey Smith G, Richards JB. 2021. Strengthening the reporting of observational studies in epidemiology using mendelian randomisation (STROBE-MR): explanation and elaboration. *BMJ (Clinical research ed.)* **375**:n2233. DOI: <https://doi.org/10.1136/bmj.n2233>, PMID: [34702754](https://pubmed.ncbi.nlm.nih.gov/34702754/)
- Sreenivasan PK**, Prasad KVVK. 2022. Increase in the level of oral neutrophils with gingival inflammation – A population survey. *The Saudi Dental Journal* **34**:795–801. DOI: <https://doi.org/10.1016/j.sdentj.2022.11.004>, PMID: [36570581](https://pubmed.ncbi.nlm.nih.gov/36570581/)
- Steinmetz O**, Hoch S, Avniel-Polak S, Gavish K, Eli-Berchoer L, Wilensky A, Nussbaum G. 2016. CX3CR1hi Monocyte/Macrophages Support Bacterial Survival and Experimental Infection-Driven Bone Resorption. *The Journal of Infectious Diseases* **213**:1505–1515. DOI: <https://doi.org/10.1093/infdis/jiv763>, PMID: [26704610](https://pubmed.ncbi.nlm.nih.gov/26704610/)
- Verbanck M**, Chen C-Y, Neale B, Do R. 2018. Detection of widespread horizontal pleiotropy in causal relationships inferred from Mendelian randomization between complex traits and diseases. *Nature Genetics* **50**:693–698. DOI: <https://doi.org/10.1038/s41588-018-0099-7>, PMID: [29686387](https://pubmed.ncbi.nlm.nih.gov/29686387/)
- Vuckovic D**, Bao EL, Akbari P, Lareau CA, Mousas A, Jiang T, Chen M-H, Raffield LM, Tardaguila M, Huffman JE, Ritchie SC, Megy K, Ponstingl H, Penkett CJ, Albers PK, Wigdor EM, Sakaue S, Moscati A, Manansala R, Lo KS, et al. 2020. The Polygenic and Monogenic Basis of Blood Traits and Diseases. *Cell* **182**:1214–1231.e11. DOI: <https://doi.org/10.1016/j.cell.2020.08.008>, PMID: [32888494](https://pubmed.ncbi.nlm.nih.gov/32888494/)
- Wallace C**. 2020. Eliciting priors and relaxing the single causal variant assumption in colocalisation analyses. *PLoS Genetics* **16**:e1008720. DOI: <https://doi.org/10.1371/journal.pgen.1008720>, PMID: [32310995](https://pubmed.ncbi.nlm.nih.gov/32310995/)
- White P**, Sakellari D, Roberts H, Risafi I, Ling M, Cooper P, Milward M, Chapple I. 2016. Peripheral blood neutrophil extracellular trap production and degradation in chronic periodontitis. *Journal of Clinical Periodontology* **43**:1041–1049. DOI: <https://doi.org/10.1111/jcpe.12628>, PMID: [27678376](https://pubmed.ncbi.nlm.nih.gov/27678376/)
- Wilensky A**, Segev H, Mizraji G, Shaul Y, Capucha T, Shacham M, Hovav A-H. 2014. Dendritic Cells and their role in periodontal disease. *Oral Diseases* **20**:119–126. DOI: <https://doi.org/10.1111/odi.12122>, PMID: [23656605](https://pubmed.ncbi.nlm.nih.gov/23656605/)
- Xue H**, Shen X, Pan W. 2021. Constrained maximum likelihood-based Mendelian randomization robust to both correlated and uncorrelated pleiotropic effects. *American Journal of Human Genetics* **108**:1251–1269. DOI: <https://doi.org/10.1016/j.ajhg.2021.05.014>, PMID: [34214446](https://pubmed.ncbi.nlm.nih.gov/34214446/)
- Yamazaki K**, Ohsawa Y, Yoshie H. 2001. Elevated proportion of Natural Killer T cells in periodontitis lesions: a common feature of chronic inflammatory diseases. *American Journal of Pathology* **158**:1391–1398. DOI: [https://doi.org/10.1016/S0002-9440\(10\)64090-4](https://doi.org/10.1016/S0002-9440(10)64090-4), PMID: [11290557](https://pubmed.ncbi.nlm.nih.gov/11290557/)
- Yang B**, Pang X, Li Z, Chen Z, Wang Y. 2021. Immunomodulation in the Treatment of Periodontitis: Progress and Perspectives. *Frontiers in Immunology* **12**:781378. DOI: <https://doi.org/10.3389/fimmu.2021.781378>, PMID: [34868054](https://pubmed.ncbi.nlm.nih.gov/34868054/)
- Ye X**, Liu B, Bai Y, Cao Y, Lin S, Lyu L, Meng H, Dai Y, Ye D, Pan W, Wang Z, Mao Y, Chen Q. 2023. Genetic evidence strengthens the bidirectional connection between gut microbiota and periodontitis: insights from a two-sample Mendelian randomization study. *J Transl Med* **21**:674. DOI: <https://doi.org/10.1186/s12967-023-04559-9>, PMID: [37770955](https://pubmed.ncbi.nlm.nih.gov/37770955/)
- Zhang Q**, Wang N, Rui Y, Xia Y, Xiong S, Xia X. 2023. New insight of metabolomics in ocular diseases in the context of 3P medicine. *The EPMA journal* **14**:53–71. DOI: <https://doi.org/10.1007/s13167-023-00313-9>, PMID: [36866159](https://pubmed.ncbi.nlm.nih.gov/36866159/)
- Zidar A**, Kristl J, Kocbek P, Zupančič Š. 2021. Treatment challenges and delivery systems in immunomodulation and probiotic therapies for periodontitis. *Expert Opinion on Drug Delivery* **18**:1229–1244. DOI: <https://doi.org/10.1080/17425247.2021.1908260>, PMID: [33760648](https://pubmed.ncbi.nlm.nih.gov/33760648/)
- Zuber V**, Colijn JM, Klaver C, Burgess S. 2020. Selecting likely causal risk factors from high-throughput experiments using multivariable Mendelian randomization. *Nature Communications* **11**:29. DOI: <https://doi.org/10.1038/s41467-019-13870-3>, PMID: [31911605](https://pubmed.ncbi.nlm.nih.gov/31911605/)

**Table 1.** Characteristics of the GWAS data for MR.

| Phenotype                       | Year | Sample size (ncase/ncontrol) | nSNP        | Ancestry | Unit              | Consortium/cohort | PMID     |
|---------------------------------|------|------------------------------|-------------|----------|-------------------|-------------------|----------|
| <i>Exposure</i>                 |      |                              |             |          |                   |                   |          |
| Circulating immune cells        | 2020 | 563,946                      | 15million   | European | /nL               | BCC               | 32888494 |
| Lymphocyte subsets              | 2020 | 3,757                        | 15.2million | European | /ug               | Sardinian cohort  | 32929287 |
| <i>Outcome</i>                  |      |                              |             |          |                   |                   |          |
| Periodontitis                   | 2019 | 35,096 (12,251/22,845)       | 10.8million | European | Event             | GLIDE             | 31235808 |
| Chronic periodontitis (FinnGen) | 2023 | 263,668 (4,434/259,234)      | 20.2million | European | Event             | FinnGen (R9K11)   |          |
| Chronic gingivitis (FinnGen)    | 2021 | 196,245 (850/195,395)        | 16.4million | European | Event             | FinnGen (R5K11)   | 36653562 |
| Gingival hyperplasia (FinnGen)  | 2023 | 259,613 (379/259,234)        | 20.2million | European | Event             | FinnGen (R9K11)   |          |
| <i>Covariate</i>                |      |                              |             |          |                   |                   |          |
| Cigarettes smoked per day       | 2019 | 249,752                      | 12million   | European | 1/SD              | GSCAN             | 30643251 |
| Fasting plasma glucose          | 2021 | 200,622                      | 31million   | European | mmol/L            | MAGIC             | 34059833 |
| Body mass index                 | 2018 | 681,275                      | 2.3million  | European | kg/m <sup>2</sup> | GIANT             | 30124842 |

**Abbreviations:** BCC, Blood Cell Consortium; GIANT, GWAS of the Genetic Investigation of ANthropometric Traits; GLIDE, Gene-Lifestyle Interactions in Dental Endpoints; GSCAN, GWAS and Sequencing Consortium of Alcohol and Nicotine use; MAGIC, Meta-Analysis of Glucose and Insulin-related Traits Consortium; SD, standard deviation; SNP, single nucleotide polymorphism.



**Table 2.** Ranking of risk factors and models for periodontitis in MR-BMA analysis.

| Trait                 | Ranking by MIP | MIP   | MACE   | Ranking by PP | PP    | MSCE   |
|-----------------------|----------------|-------|--------|---------------|-------|--------|
| Neutrophil            | 1              | 0.895 | 0.097  | 1             | 0.771 | 0.108  |
| Natural Killer T cell | 2              | 0.135 | -0.003 | 2             | 0.056 | -0.017 |
| Plasmacytoid DC       | 3              | 0.102 | 0      | 3             | 0.045 | 0.007  |

**Abbreviations:** DC, dendritic cell; MACE, average causal effect of risk factor model; MIP, marginal inclusion probability; MR-BMA, Mendelian randomization-Bayesian model averaging; MSCE, model-specific causal estimates; PP, poster probability.

**Table 2.** TWAS and colocalization analysis identified genes involved in multiple phenotypes.

| Gene name      | Position | Phenotype       | TWAS Z-score | TWAS <i>p</i> val     | Perm <i>p</i> val    | Model <i>p</i> val    | PP.H3 | PP.H4 |
|----------------|----------|-----------------|--------------|-----------------------|----------------------|-----------------------|-------|-------|
| <i>S100A9</i>  | 1q21.3   | Neutrophil      | 7.225        | $5.0 \times 10^{-13}$ | NA                   | $1.7 \times 10^{-17}$ | 0.035 | 0.962 |
|                |          | Periodontitis   | -3.564       | $3.7 \times 10^{-4}$  | $1.3 \times 10^{-3}$ | $1.7 \times 10^{-17}$ | 0.008 | 0.259 |
| <i>S100A12</i> | 1q21.3   | Neutrophil      | 7.310        | $2.7 \times 10^{-13}$ | $1.7 \times 10^{-4}$ | $4.1 \times 10^{-43}$ | 0.027 | 0.970 |
|                |          | Periodontitis   | -3.513       | $4.4 \times 10^{-4}$  | $8.1 \times 10^{-4}$ | $4.1 \times 10^{-43}$ | 0.008 | 0.244 |
| <i>MCM6</i>    | 2q21.3   | Neutrophil      | -5.549       | $2.9 \times 10^{-8}$  | NA                   | $3.5 \times 10^{-13}$ | 0     | 0.999 |
|                |          | Plasmacytoid DC | 7.172        | $7.4 \times 10^{-13}$ | $2.7 \times 10^{-3}$ | $3.5 \times 10^{-13}$ | 1.000 | 0     |
| <i>PI4KAP2</i> | 22q11.21 | Neutrophil      | 5.345        | $9.0 \times 10^{-8}$  | $3.3 \times 10^{-3}$ | $3.7 \times 10^{-39}$ | 0.003 | 0.016 |
|                |          | Plasmacytoid DC | 5.322        | $1.0 \times 10^{-7}$  | $3.2 \times 10^{-3}$ | $3.7 \times 10^{-39}$ | 0.009 | 0.045 |

**Abbreviations:** DC, dendritic cell; Perm, permutation test; PP, poster probability; TWAS, transcriptome-wide association study.

eLife digest for

## **Genetic associations between circulating immune cells and periodontitis highlight the prospect of systemic immunoregulation in periodontal care**

*Xinjian Ye, Yijing Bai, Mengjun Li, Yuhang Ye, Yitong Chen, Bin Liu, Yuwei Dai, Shan Wang, Weiyi Pan, Zhiyong Wang, Yingying Mao & Qianming Chen*

---

### eLife digest

---

#### eLife digest

The World Health Organization acknowledges the significant bidirectional correlation between oral health and overall well-being, highlighting the crucial role of dental healthcare in medical practice and public health. Employing the principle of "one hair pulled moves the whole body", systemic immunoregulation remains a promising approach for maintaining oral health equilibrium.

Periodontal tissue, analogous to soil for plants, provides necessary support and nourishment to teeth. Periodontitis inflicts irreversible damage upon teeth by eroding these underlying tissues, leading to the loosening or even loss of teeth. Notably, localized periodontal inflammation can exert a bidirectional adverse effect on systemic disorders through the immune system. Circulating immune cells serve as the "sentries" of the immune system, congregating in the locally inflamed tissues to fend off invading pathogens. However, the immune response, while protective, inevitably causes collateral damage to tissues.

However, the association between circulating immune cells and periodontitis is influenced by multiple confounding factors (including environmental and behavioral factors), as well as reverse causality (for instance the local inflammatory tissue stimulating immune cell production). Conventional research methods often fall short in uncovering the genuine causal relationship. Ye, Bai et al. utilized the novel approach of Mendelian randomization to investigate their inherent relationships from a genetic standpoint.

Specifically, Ye, Bai et al. employed genetic variants as instrumental variables to investigate the causal association between specific circulating immune cells and periodontitis. Their findings suggest a genetic association between neutrophils, natural killer T cells, plasmacytoid dendritic cells, and an increased susceptibility to periodontitis. Among these, neutrophils are acknowledged as the primary

contributing factor the pathogenesis of periodontitis. Furthermore, the study reveals crucial genes that collectively contribute to both the initiation of the immune response and the progression of periodontitis, which may serve as potential targets for immunomodulation in periodontal care.

These findings confirm the robust correlation among oral health, systemic immune homeostasis, and systemic diseases within the Oral and General Health Axis, which provide potential avenues for early diagnosis, risk assessment, targeted prevention, and personalized treatment to dental practitioners and patients afflicted with periodontal diseases. Considering the marginal association observed, further research is necessary to comprehensively understand the underlying biological mechanisms and establish the clinical relevance.

Figure Legend for

## Genetic associations between circulating immune cells and periodontitis highlight the prospect of systemic immunoregulation in periodontal care

Xinjian Ye, Yijing Bai, Mengjun Li, Yuhang Ye, Yitong Chen, Bin Liu, Yuwei Dai, Shan Wang, Weiyi Pan, Zhiyong Wang, Yingying Mao & Qianming Chen

### Figure Legend

**Figure 1.** Study design. (A) Overview of the process and principal assumptions of MR. (B) Data sources of the GWASs. (C) Methods performed in the present study.

**Abbreviations and Notes:** BCC, Blood Cell Consortium; BMA, Bayesian model averaging, a high-throughput method based on non-linear regression; BMI, body mass index; FPG, fasting plasma glucose; FUSION, functional summary-based imputation; GLIDE, Gene-Lifestyle Interactions in Dental Endpoints collaboration consortium; GWAS, genome-wide association study; IVW, inverse variance weighted, the primary method in MR to explore the association between exposure and outcome; LOO, leave-one-out, a method for detecting potential influential SNPs; SNP, single nucleotide polymorphism, as genetic instrumental variables for the exposure and outcome; MACE, model-averaged causal estimate; MIP, marginal probability of inclusion; MR, Mendelian randomization; MR-PRESSO, Mendelian Randomization Pleiotropy RESidual Sum and Outlier, a method for assessing and rectifying pleiotropic SNPs; MSCE, model-specific causal estimate; MVMR, multivariable Mendelian randomization, a MR model for adjusting confounding and mutual correction; Neu, neutrophil; NKT, Natural Killer T cell; pDC, plasmacytoid dendritic cell; PP, posterior probability; TWAS, transcriptome-wide association study; UVMR, univariable Mendelian randomization.

**Figure 2.** Results of the UVMR. (A) A circular heatmap representing the MR analyses for the associations between circulating immune cells and the risk of periodontitis. Lines, from outermost to innermost, represent IVW, MR-WM, MR-ML, MR-Egger, and MR-PRESSO respectively. The color scale of the heatmap is based on the OR. \*  $P < 0.05$ . (B) A forest plot of the MR analyses for significant results in Figure 2A ( $P < 0.05$ ). The effects are quantified using OR with 95% CI. (C-E) The effect

estimate for each individual variant in Natural Killer T cell (C), neutrophil (D), and plasmacytoid DC (E) is provided by plotting SNP-outcome associations against SNP-exposure associations. The regression slope fitted by different MR methods is represented by lines with different colors.

**Abbreviations:** CI, confidence interval; DC, dendritic cell; F-stat, F-statistic; IVW, inverse variance weighted; Het, heterogeneity; MR, Mendelian randomization; MR-ML, Mendelian randomization weighted median; MR-WM, Mendelian randomization maximum likelihood; MR-PRESSO, Mendelian Randomization Pleiotropy RESidual Sum and Outlier; OR, odds ratio; Pleio, pleiotropy; SNP, single nucleotide polymorphism; UVMR, univariable Mendelian randomization.

**Figure 3.** Forest plot analysis of the MVMR of significant results following mutual adjustment and confounder correction. The effects are quantified using OR with 95% CI.

**Abbreviations:** CI, confidence interval; DC, Dendritic Cell; IVW, inverse variance weighted; Het, heterogeneity; LASSO, least absolute shrinkage and selection operator; MVMR, multivariable Mendelian randomization; OR, odds ratio; Pleio, pleiotropy; SNP, single nucleotide polymorphism.

**Figure 4.** Results of the subgroup and reverse MR. (A) A circular heatmap illustrates the results of the subgroup analysis and reverse MR. Lines in the heatmap represent periodontitis (GLIDE), chronic periodontitis (FinnGen), chronic gingivitis (FinnGen), gingival hyperplasia (FinnGen), and reverse MR analysis, progressing from outside to inside. The color scale of the heatmap is determined by the odds ratio (OR). \*  $P < 0.05$ . (B) A forest plot of the MR analyses for significant results in Figure 4A ( $P < 0.05$ ). The effects are quantified using OR with 95% CI. (C-F) The effect estimates for each individual variant in B cell (CP) (C), plasmacytoid DC (CP) (D), B cell (GH) (E) and CD4+ T cell (CG) (F) is provided by plotting SNP-outcome associations against SNP-exposure associations. The regression slope fitted by different MR methods is represented by lines with different colors.

**Abbreviations:** CG, chronic gingivitis; CI, confidence interval; CP, chronic periodontitis; DC, dendritic cell; F-stat, F-statistic; GH, gingival hyperplasia; GLIDE, Gene-Lifestyle Interactions in Dental Endpoints collaboration consortium; Het, heterogeneity; IVW, inverse variance weighted; MR-PRESSO, Mendelian Randomization Pleiotropy RESidual Sum and Outlier; OR, odds ratio; PD, periodontitis; Pleio, pleiotropy; SNP, single nucleotide polymorphism.

**Figure 5.** Results of the TWAS and colocalization analysis. (A) A Venn diagram illustrates the

intersecting genes shared by multiple traits ( $P < 0.05$ ). **(B)** A heatmap representing the TWAS and colocalization analysis for five genes interacting among neutrophil, Natural Killer T cell, plasmacytoid DC, and periodontitis. The TWAS Z-score is used as the color scale for the heatmap. \*  $PP.H3 + PP.H4 > 0.5$ ; \*\*  $PP.H3 + PP.H4 > 0.8$ ; \*\*\*  $PP.H4 > 0.8$ . **(C)** Manhattan plot of gene-traits associations for periodontitis. The X-axis represents genomic positions. Blue lines indicate a Z-score of 1.96. Red circles represent significant gene-trait associations ( $P < 0.05$ ). Six genes satisfy a multiple corrected threshold of  $P < 5 \times 10^{-4}$ . **(D)** Regional Manhattan plot of conditional analysis for *S100A9*, *S100A12* in periodontitis. Grey bars indicate the location of genes on chromosome 1. Genes colored in orange and green on the graph indicate the marginally and jointly significant genes that best explain the GWAS signals. Gray and blue dots respectively indicate GWAS  $p$ -values before and after conditioning on the jointly significant gene.

**Abbreviations:** DC, dendritic cell; GWAS, genome-wide association study; PP, posterior probability; TWAS, transcriptome-wide association study.

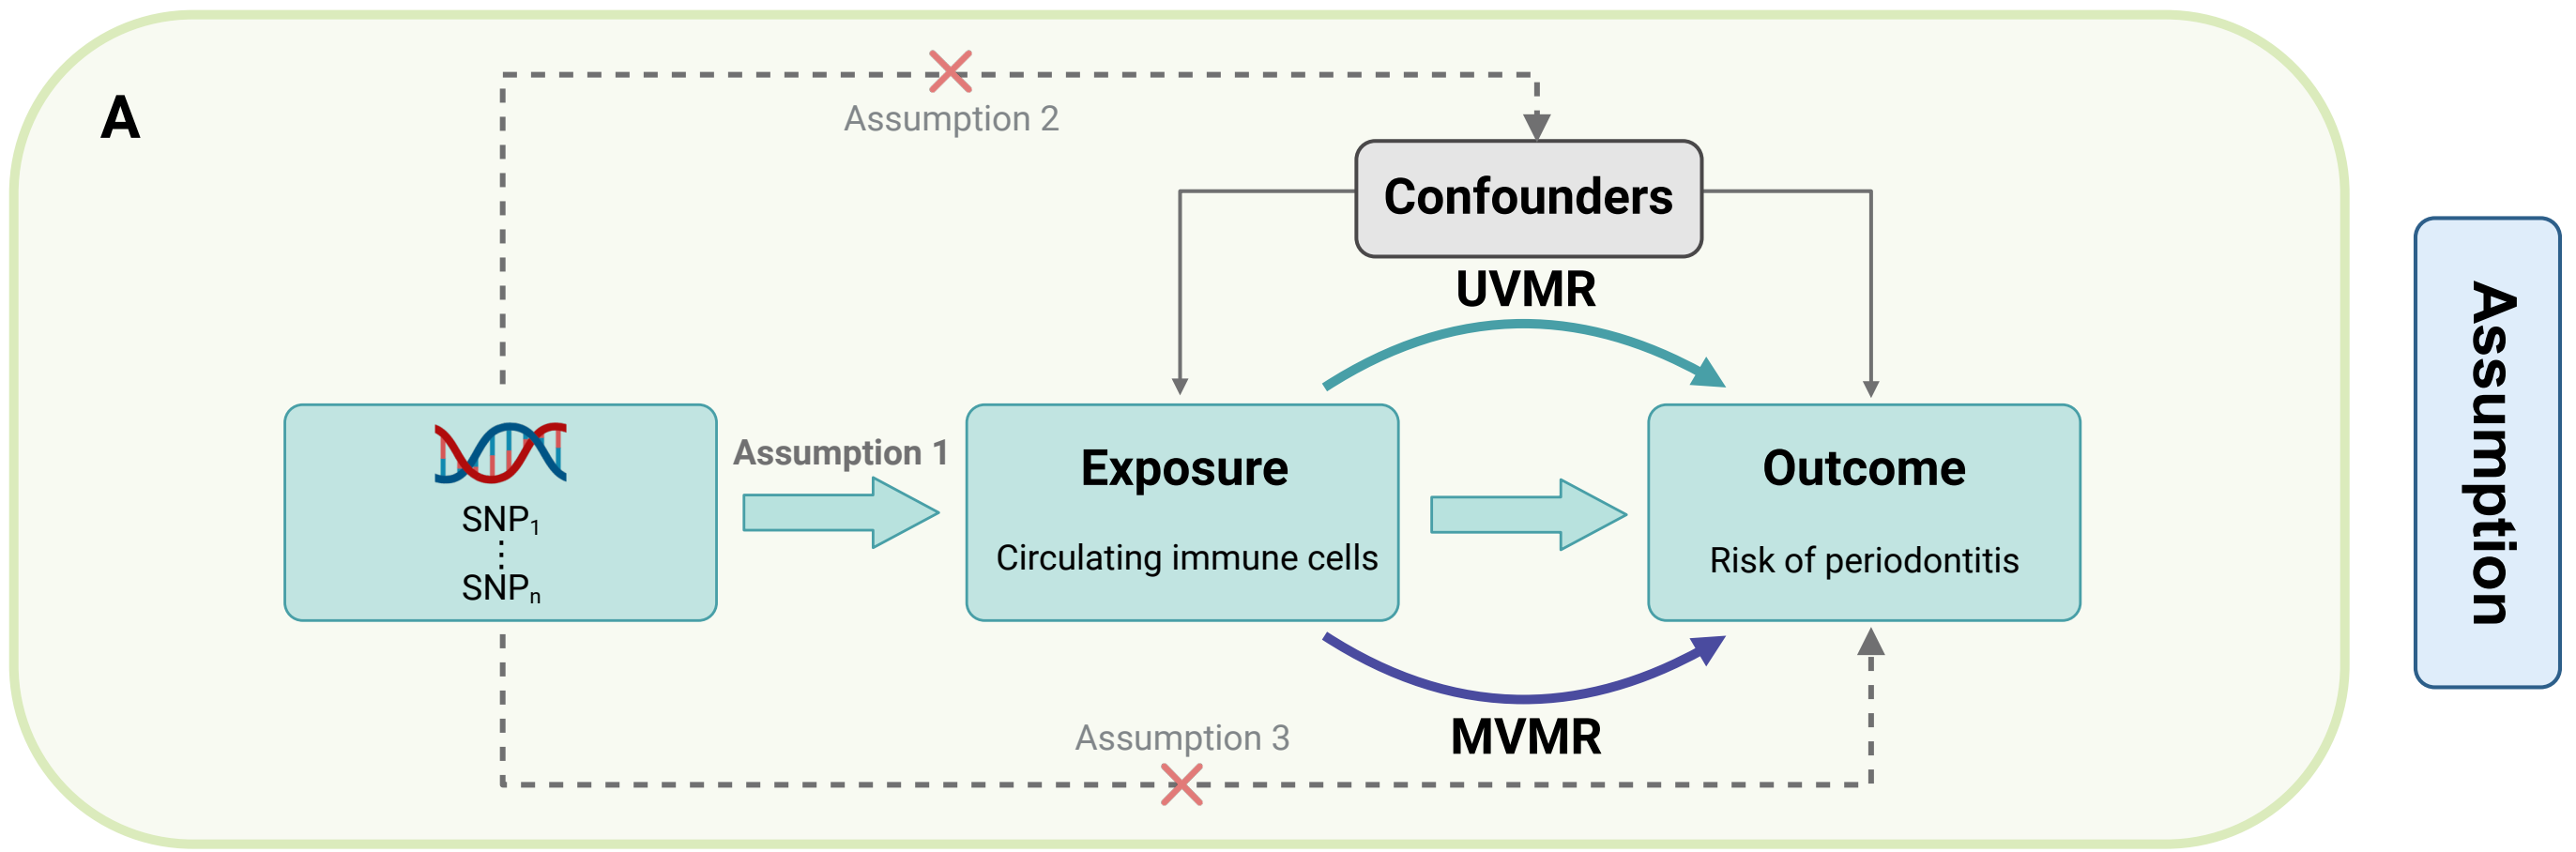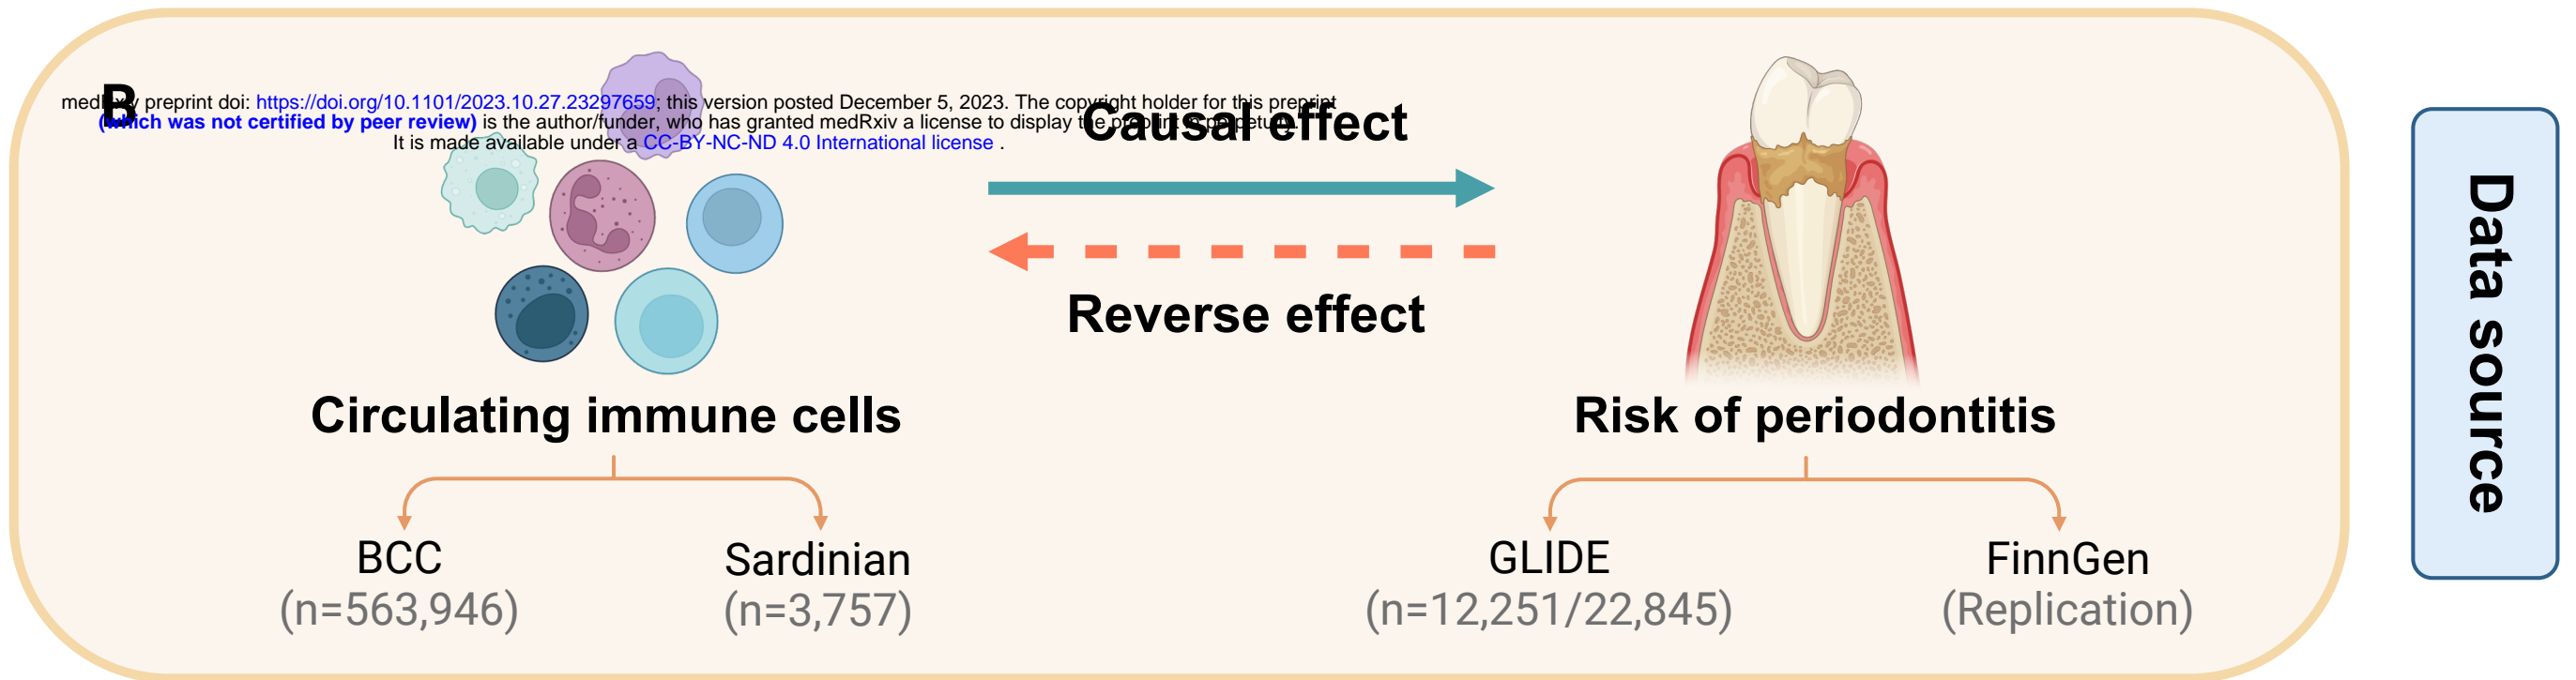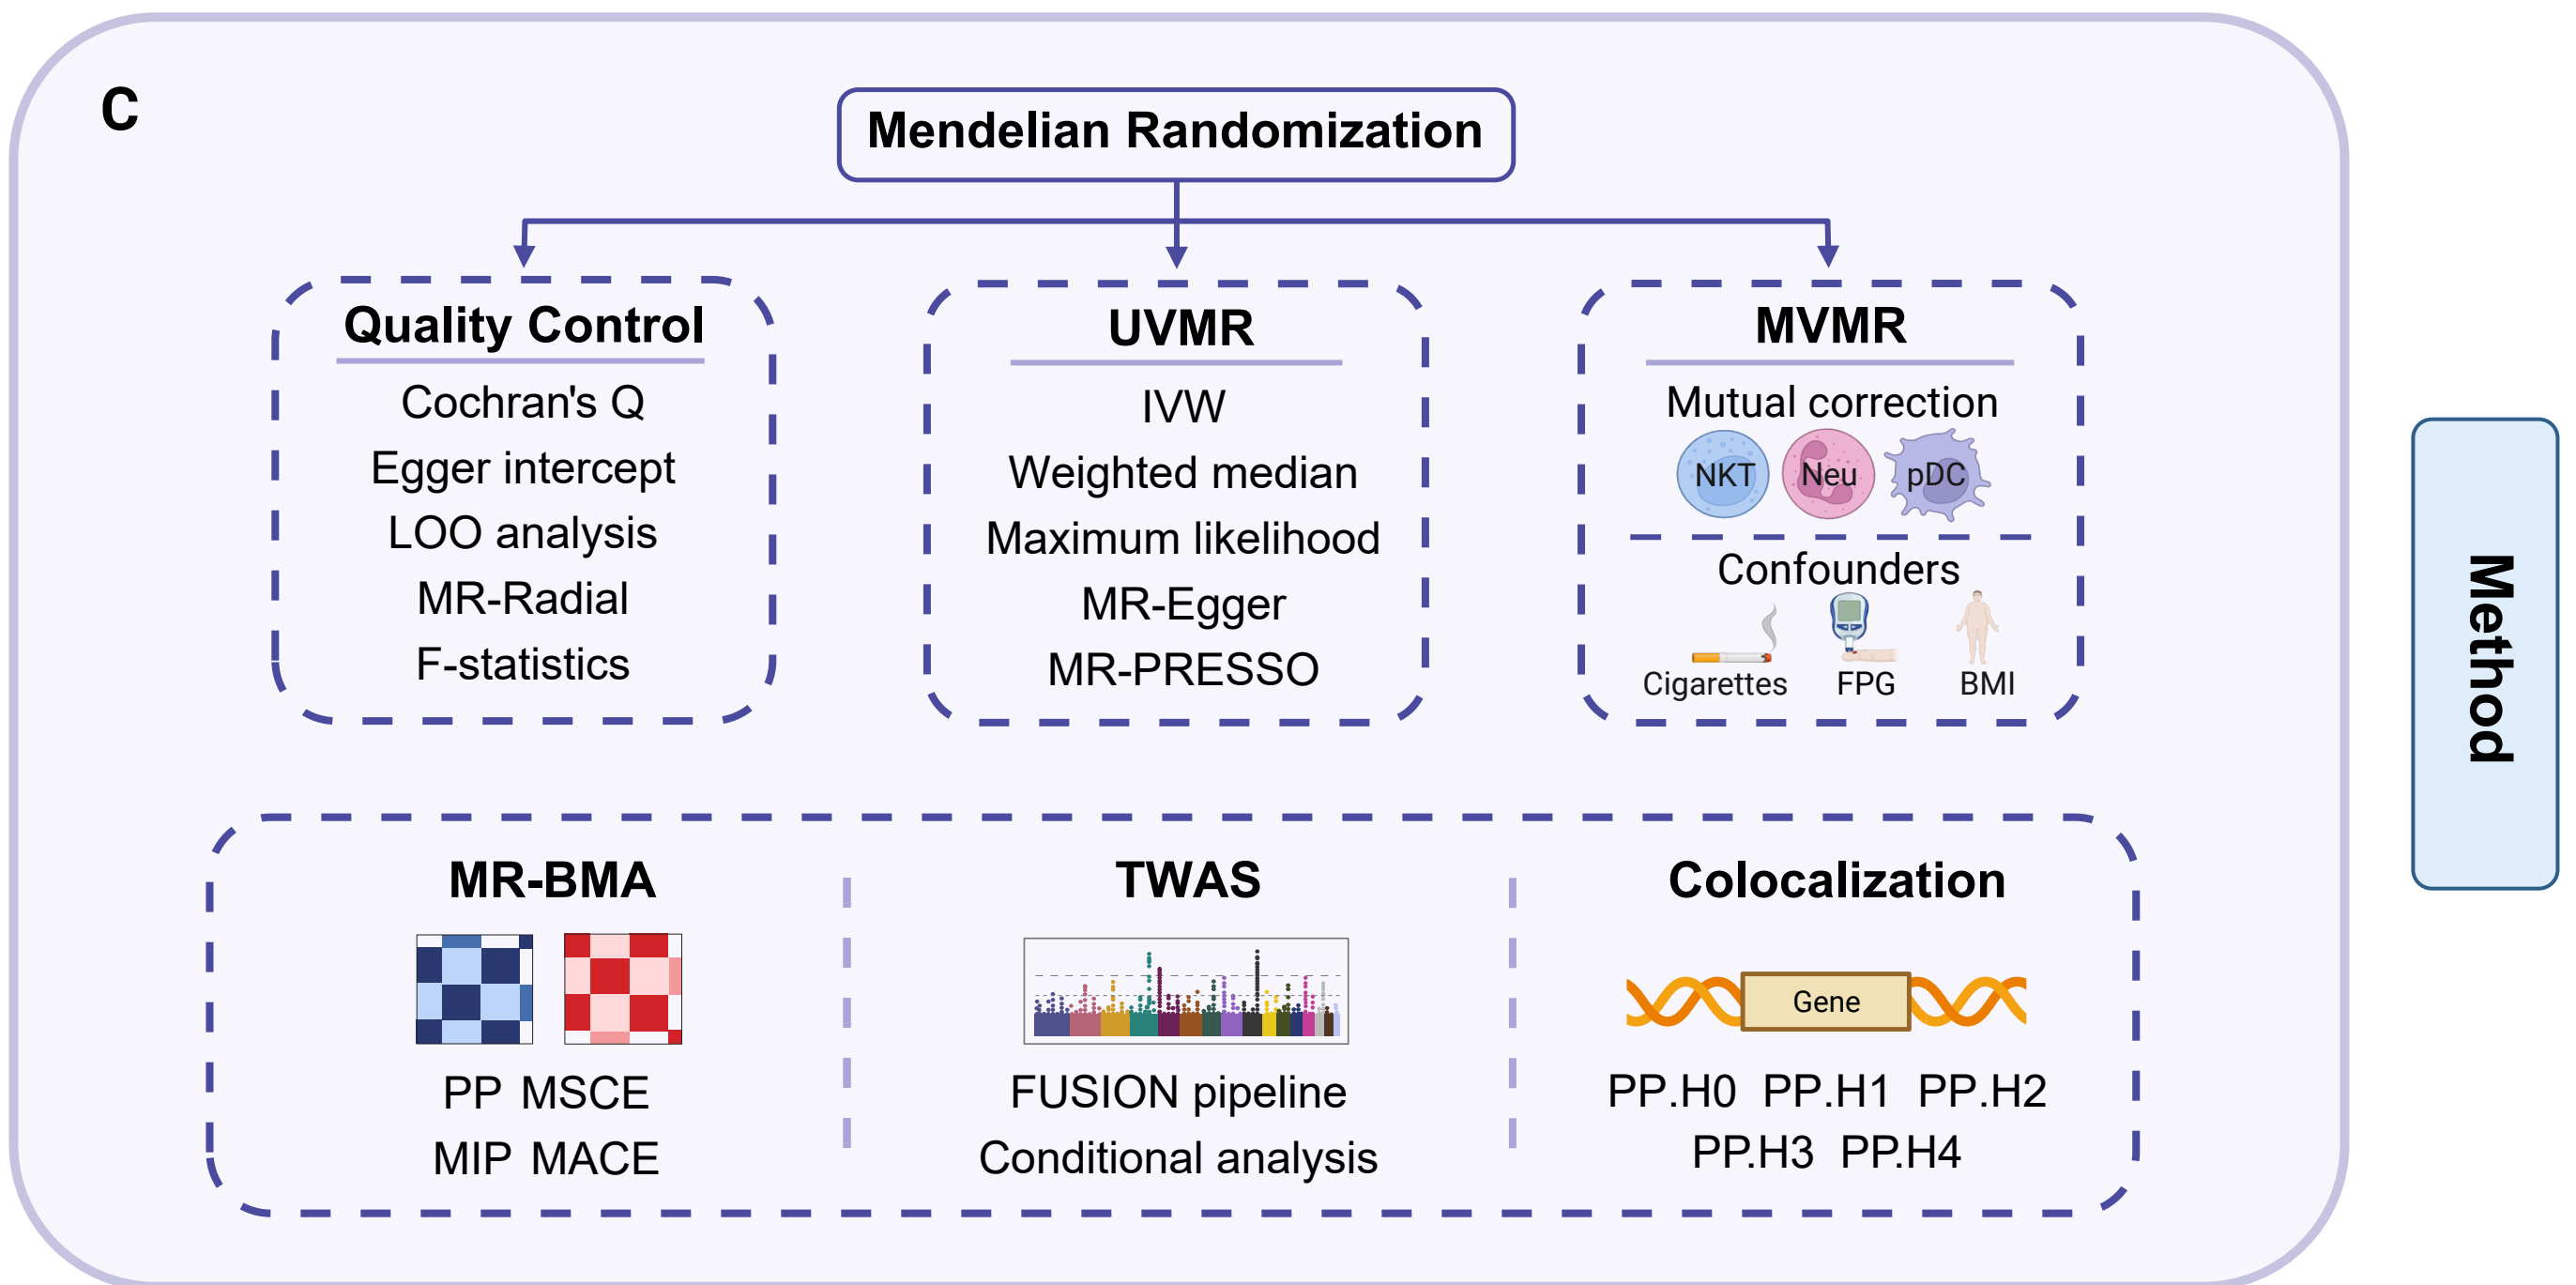

A

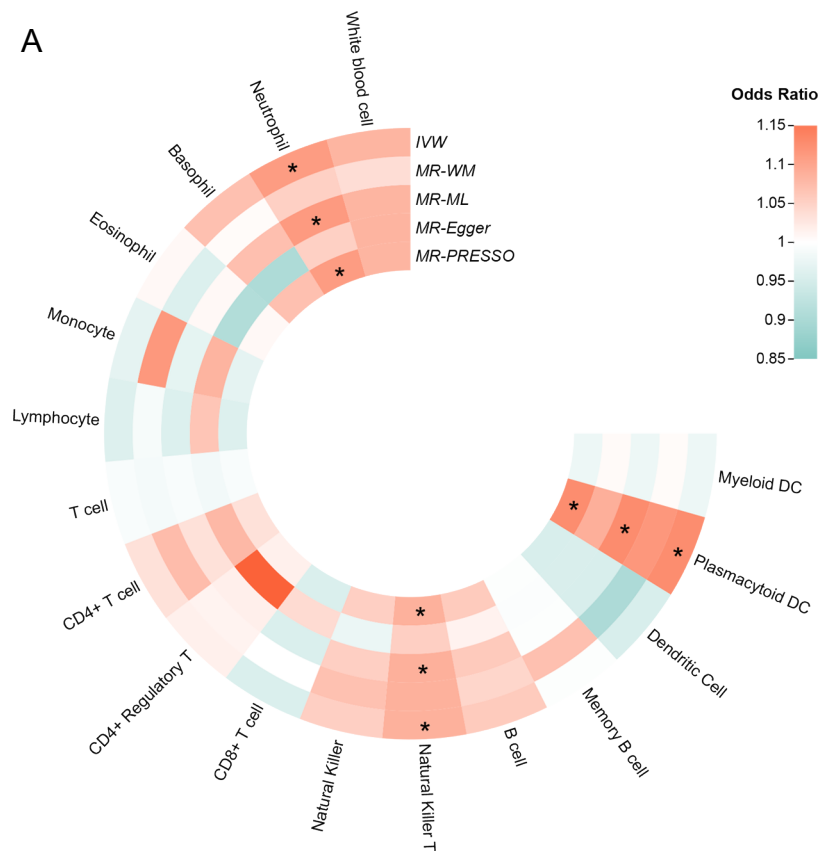

B

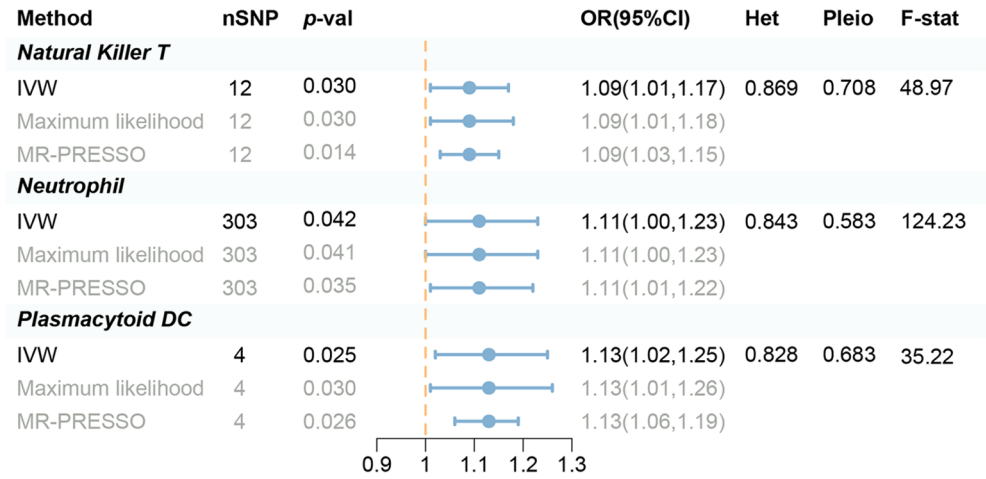

C

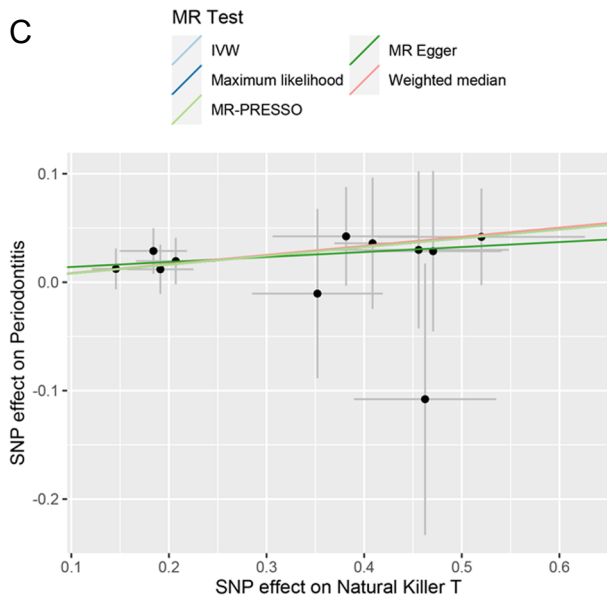

D

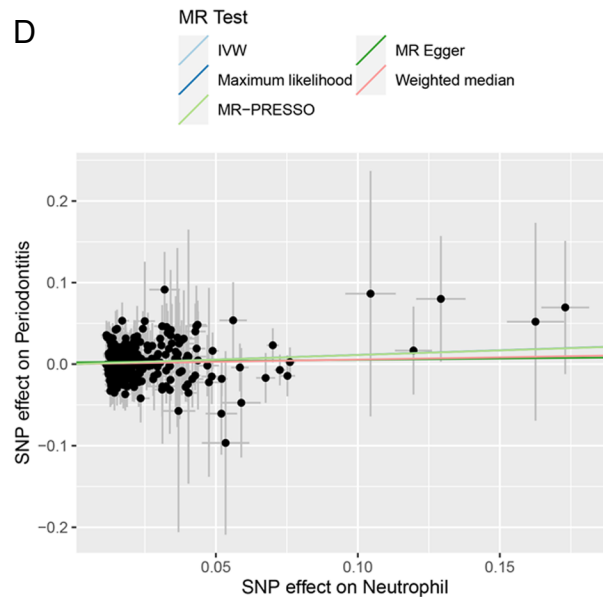

E

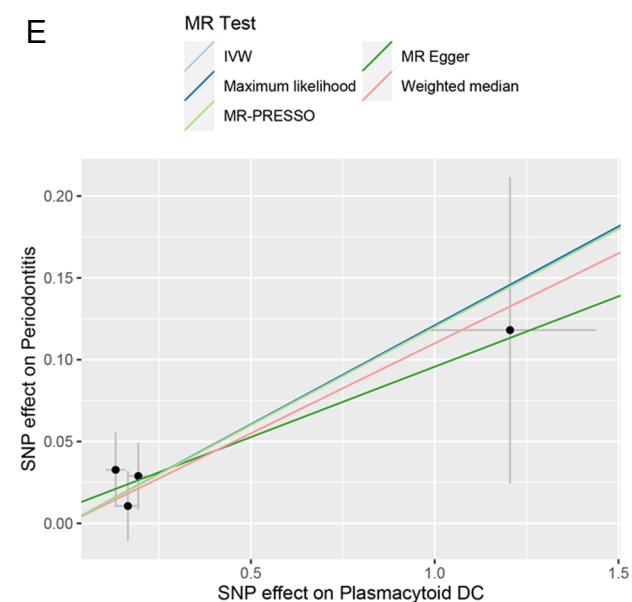



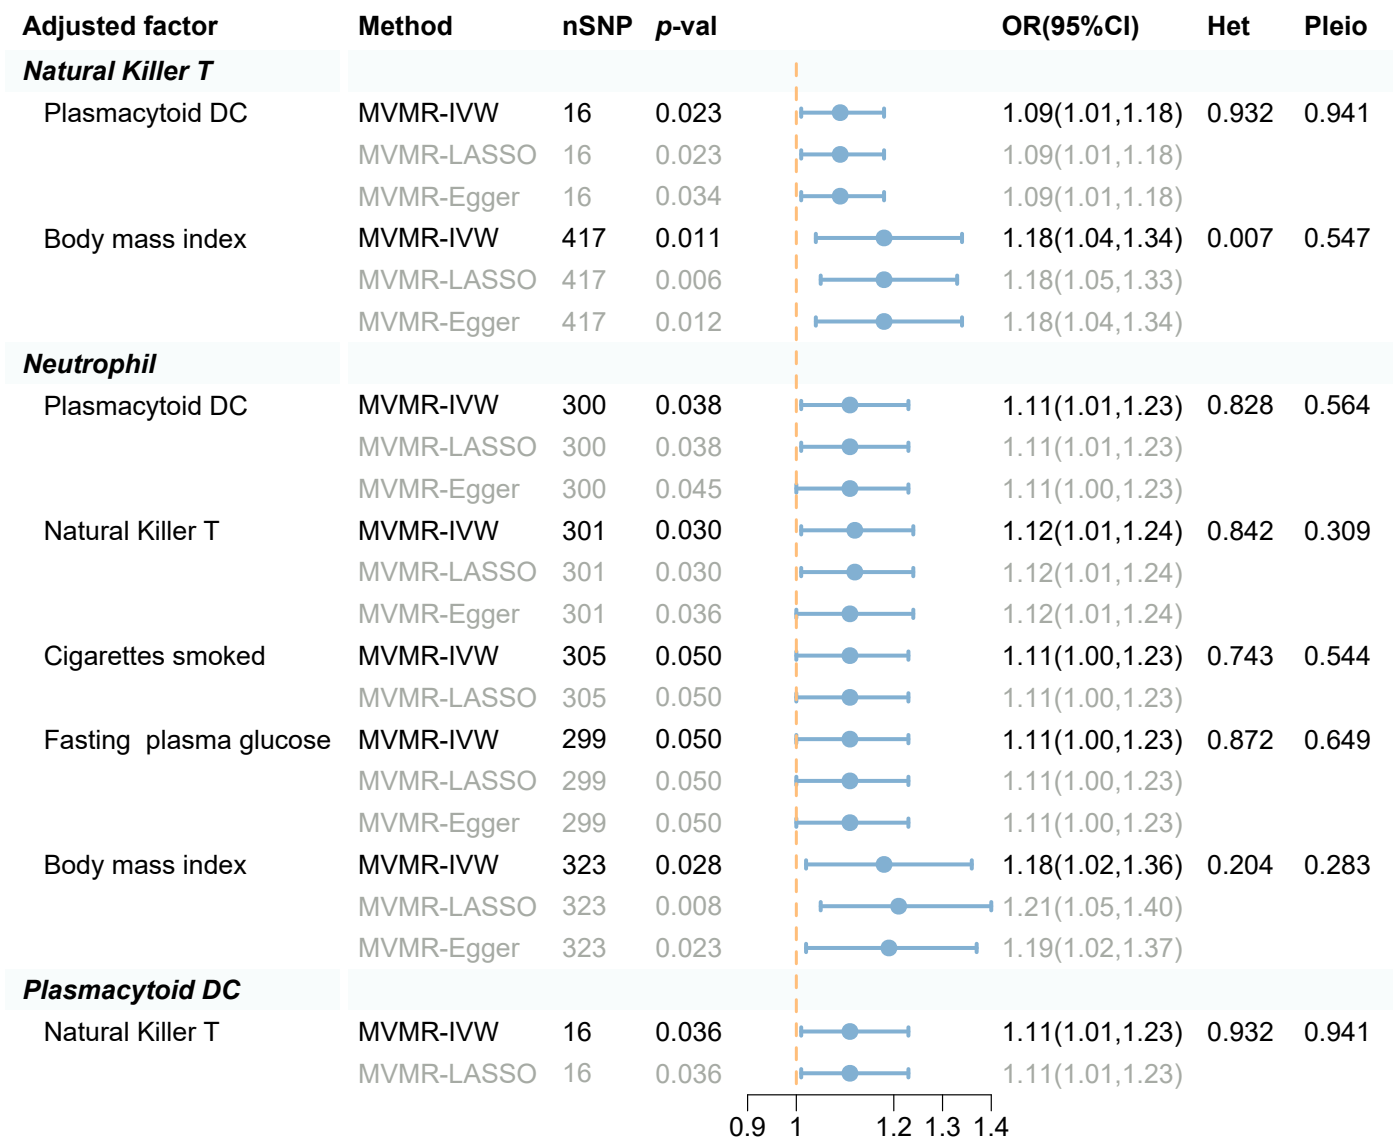

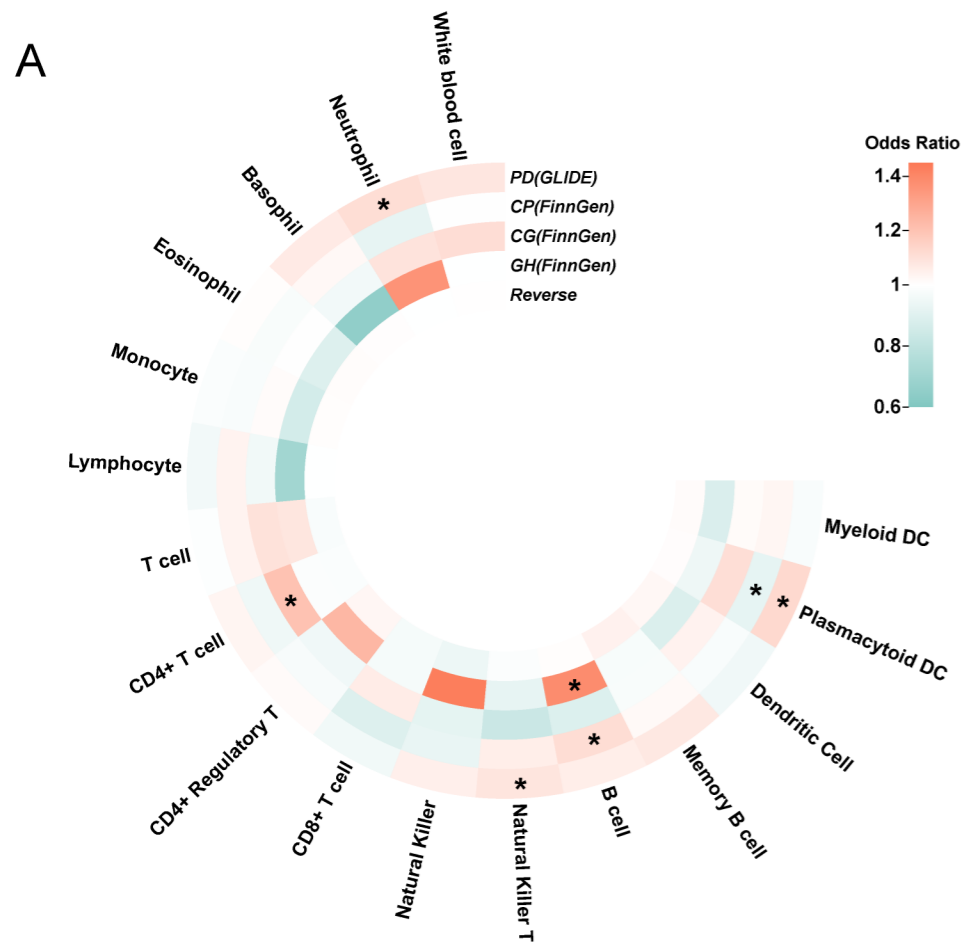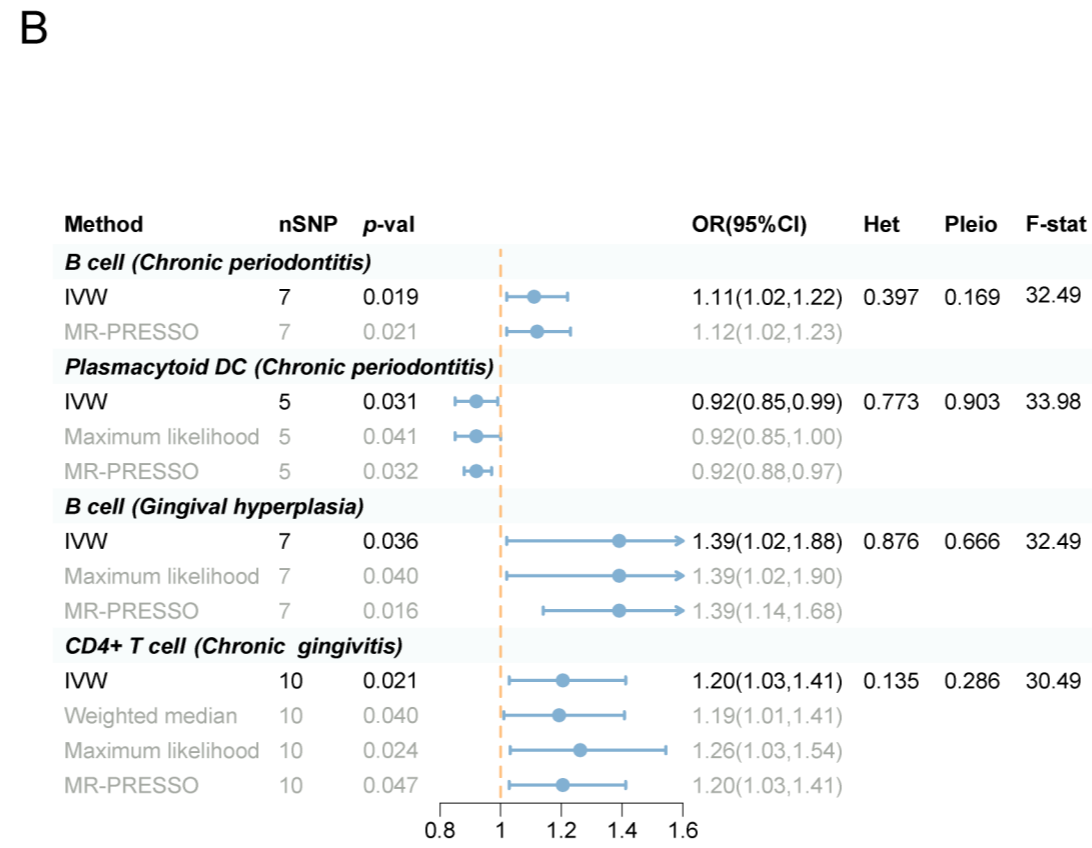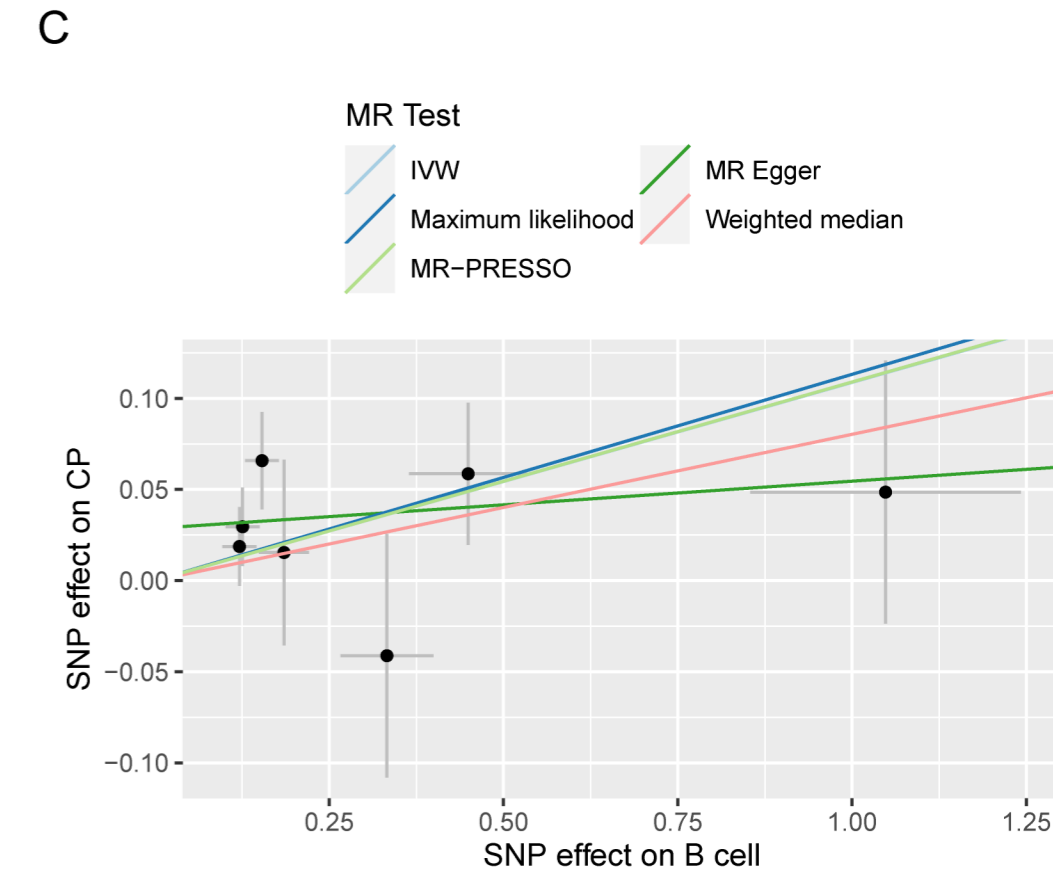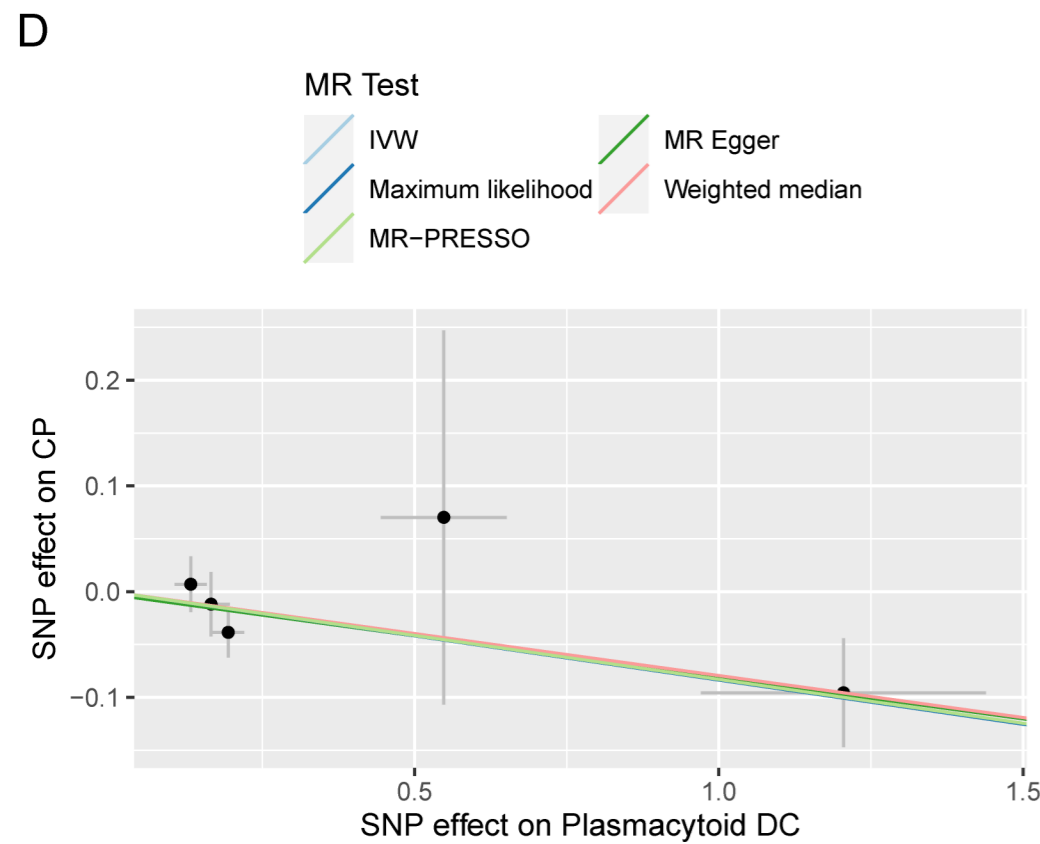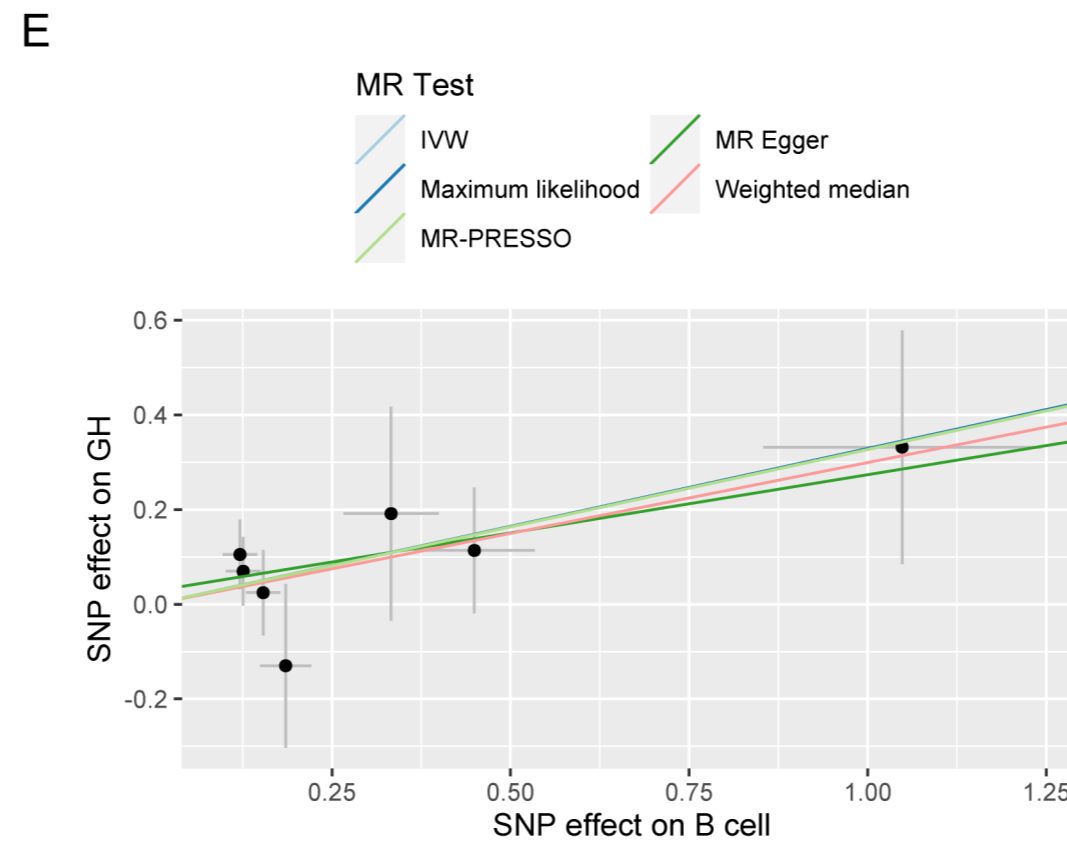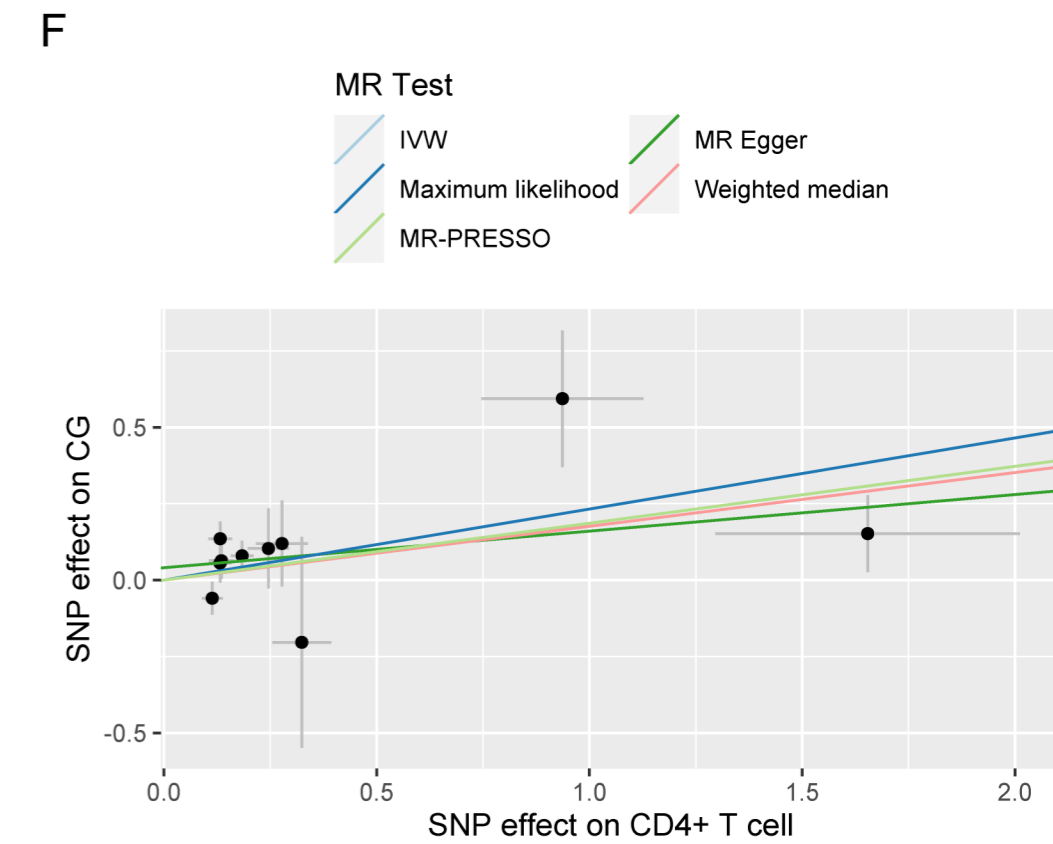

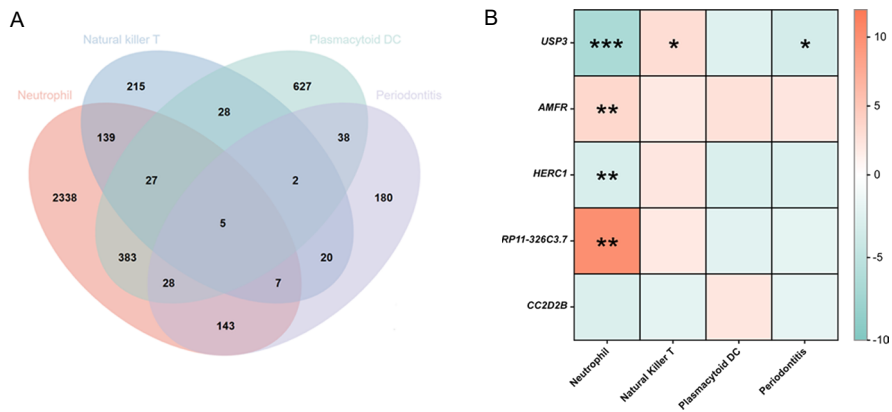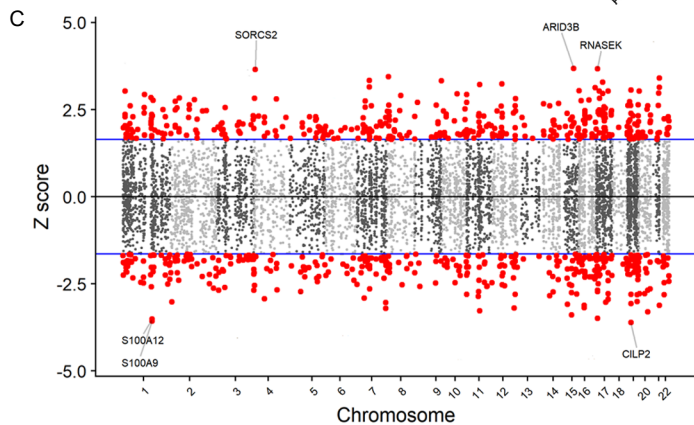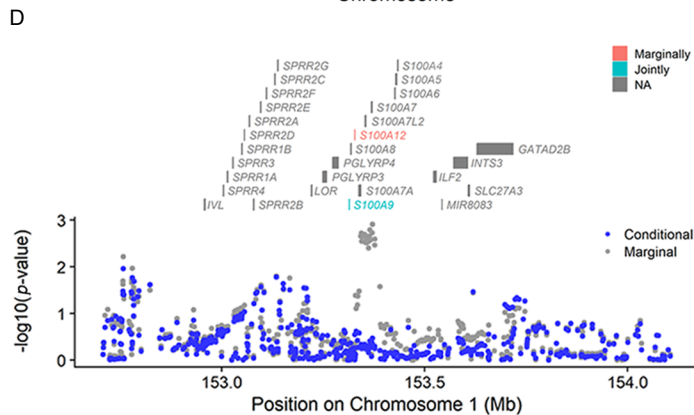

Source: https://medrxiv.org/content/10.1101/2023.10.27.23297659v2.full.pdf
